1 Hyperinflammatory ARDS is characterized by interferon-stimulated gene expression, T-cell  
2 activation, and an altered metatranscriptome in tracheal aspirates  
3

4 **Authors:** Aartik Sarma<sup>1</sup>, Stephanie A. Christenson<sup>1</sup>, Beth Shoshana Zha<sup>1</sup>, Angela Oliveira  
5 Pisco<sup>2</sup>, Lucile P.A. Neyton<sup>1</sup>, Eran Mick<sup>2,3</sup>, Pratik Sinha<sup>4</sup>, Jennifer G. Wilson<sup>5</sup>, Farzad Moazed<sup>1</sup>,  
6 Aleksandra Leligdowicz<sup>6,7</sup>, Manoj V. Maddali<sup>8</sup>, Emily R. Siegel<sup>9</sup>, Zoe Lyon<sup>9</sup>, Hanjing Zhou<sup>1</sup>,  
7 Alejandra Jauregui<sup>1</sup>, Rajani Ghale<sup>1</sup>, Saharai Caldera<sup>2</sup>, Paula Hayakawa Serpa<sup>2,3</sup>, Thomas  
8 Deiss<sup>1</sup>, Christina Love<sup>2</sup>, Ashley Byrne<sup>2</sup>, Katrina L. Kalantar<sup>2</sup>, Joseph L. DeRisi<sup>2</sup>, David J.  
9 Erle<sup>6,10,11,12</sup>, Matthew F. Krummel<sup>11,13</sup>, Kirsten N. Kangelaris<sup>14</sup>, Carolyn M. Hendrickson<sup>15</sup>,  
10 Prescott G. Woodruff<sup>1,6</sup>, Michael A. Matthay<sup>1,6,16</sup>, COMET Consortium, Charles R. Langelier<sup>2,3</sup>,  
11 Carolyn S. Calfee<sup>1,6,16</sup>

- 12 1. Division of Pulmonary, Critical Care, Allergy and Sleep Medicine, Department of  
13 Medicine, University of California San Francisco, CA
- 14 2. Chan Zuckerberg Biohub, San Francisco, CA
- 15 3. Division of Infectious Diseases, Department of Medicine, University of California San  
16 Francisco, CA
- 17 4. Department of Anesthesia, Washington University in St Louis
- 18 5. Department of Emergency Medicine, Stanford University School of Medicine, Stanford  
19 University, Stanford, CA
- 20 6. Cardiovascular Research Institute, University of California San Francisco, CA
- 21 7. Interdepartmental Division of Critical Care Medicine, University of Toronto, Toronto,  
22 Ontario, Canada
- 23 8. Division of Pulmonary, Allergy, and Critical Care Medicine, Department of Medicine,  
24 Stanford University, Stanford, CA
- 25 9. School of Medicine, University of California San Francisco, CA
- 26 10. Lung Biology Center, University of California San Francisco, CA
- 27 11. Bakar ImmunoX Initiative, University of California San Francisco, CA
- 28 12. UCSF CoLabs, University of California San Francisco, CA
- 29 13. Department of Pathology, University of California San Francisco, CA
- 30 14. Division of Hospital Medicine, University of California San Francisco, CA
- 31 15. Division of Pulmonary and Critical Care Medicine, Department of Medicine, Zuckerberg  
32 San Francisco General Hospital and Trauma Center, University of California San  
33 Francisco
- 34 16. Department of Anesthesia, University of California San Francisco, CA

35  
36 **Funding:** F32HL151117 (AS), R35HL140026 (CSC), 2R24AA019661-06A1 (CSC), NIH/NHLBI  
37 K23HL138461-01A1 (CRL), U19 AI1077439 (DJE, CSC), UCSF ImmunoX CoLabs, Chan  
38 Zuckerberg Foundation 2019-202665, Genentech TSK-020586  
39

40 **Abstract:** Two molecular phenotypes of the acute respiratory distress syndrome (ARDS) with  
41 substantially different clinical trajectories have been identified. Classification as  
42 “hyperinflammatory” or “hypoinflammatory” depends on plasma biomarker profiling. Differences  
43 in the biology underlying these phenotypes at the site of injury, the lung, are unknown. We  
44 analyze tracheal aspirate (TA) transcriptomes from 46 mechanically ventilated subjects to  
45 assess differences in lung inflammation and repair between ARDS phenotypes. We then  
46 integrate these results with metatranscriptomic sequencing, single-cell RNA sequencing, and  
47 plasma proteomics to identify distinct features of each ARDS phenotype. We also compare

48 phenotype-specific differences in gene expression to experimental models of acute lung injury  
49 and use an *in silico* analysis to identify candidate treatments for each phenotype. We find that  
50 hyperinflammatory ARDS is associated with increased integrated stress response and interferon  
51 gamma signaling, distinct immune cell polarization, and differences in microbial community  
52 composition in TA. These findings demonstrate that each phenotype has distinct respiratory  
53 tract biology that may be relevant to developing effective therapies for ARDS.

54

55 **Word count:** 3,994

56

57 **COMET Consortium:**

58 K. Mark Ansel<sup>17,18</sup>, Yumiko Abe-Jones<sup>14</sup>, Saurabh Asthana<sup>11,13</sup>, Alexander Beagle<sup>19</sup>, Sharvari  
59 Bhide<sup>15</sup>, Cathy Cai<sup>20</sup>, Sidney A. Carrillo<sup>1</sup>, Suzanna Chak<sup>1</sup>, Vincent Chan<sup>11,13,18</sup>, Nayvin  
60 Chew<sup>11,12,13,21</sup>, Zachary Collins<sup>11,13</sup>, Alexis Combes<sup>11,12,13,21</sup>, Tristan Courau<sup>11,12,13,21</sup>, Spyros  
61 Darmanis<sup>22</sup>, Catherine DeVoe<sup>3</sup>, Gabriela K. Fragiadakis<sup>11,12,23</sup>, Kamir Hiam<sup>2,18,20,24,25</sup>, Kenneth  
62 Hu<sup>11,13,21</sup>, Billy Huang<sup>26</sup>, Norman Jones<sup>27</sup>, Nitasha Kumar<sup>27</sup>, Divya Kushnoor<sup>11,12,13,21</sup>, Tasha  
63 Lea<sup>13</sup>, Deanna Lee<sup>6,15</sup>, David Lee<sup>11,23,28</sup>, Yale Liu<sup>19</sup>, Salman Mahboob<sup>26</sup>, Jeff Milush<sup>27</sup>, Priscila  
64 Muñoz-Sandoval<sup>17,18</sup>, Viet Nguyen<sup>6,15</sup>, Randy Parada<sup>26</sup>, Ravi Patel<sup>11,12</sup>, Maira Phelps<sup>2</sup>, Logan  
65 Pierce<sup>14</sup>, Priya Prasad<sup>14</sup>, Arjun Rao<sup>11,13</sup>, Sadeed Rashid<sup>20</sup>, Gabriella Reeder<sup>11,12,29</sup>, Nicklaus  
66 Rodriguez<sup>20</sup>, Bushra Samad<sup>11,13</sup>, Cole Shaw<sup>11,12</sup>, Alan Shen<sup>11,12,13,21</sup>, Austin Sigman<sup>1</sup>, Matthew  
67 Spitzer<sup>2,18,20,24,25</sup>, Yang Sun<sup>23</sup>, Sara Sunshine<sup>30</sup>, Kevin Tang<sup>20</sup>, Luz Torres Altamirano<sup>20</sup>,  
68 Alexandra Tsitsiklis<sup>3</sup>, Jessica Tsui<sup>11,12,13,21</sup>, Alyssa Ward<sup>23</sup>, Andrew Willmore<sup>1</sup>, Michael Wilson<sup>31</sup>,  
69 Juliane Winkler<sup>20</sup>, Kristine Wong<sup>20</sup>, Jimmie Ye<sup>2,23,25,28,32,33</sup>, Michelle Yu<sup>1</sup>, Wandu Zhu<sup>17,18</sup>

- 70 17. Sandler Asthma Basic Research Center, University of California San Francisco, CA  
71 18. Department of Microbiology and Immunology, University of California San Francisco, CA  
72 19. Department of Medicine, University of California San Francisco, CA  
73 20. Helen Diller Family Comprehensive Cancer Center, University of California San  
74 Francisco, CA  
75 21. Department of Anatomy, University of California San Francisco, CA  
76 22. Microchemistry, Proteomics and Lipidomics Department, Genentech Inc, 1 DNA Way,  
77 South San Francisco, CA, 94080  
78 23. Division of Rheumatology, Department of Medicine, University of California San  
79 Francisco, CA  
80 24. Department of Otolaryngology, University of California San Francisco, CA  
81 25. Parker Institute for Cancer Immunotherapy, San Francisco, CA  
82 26. Department of Orofacial Sciences, School of Dentistry, University of California San  
83 Francisco, CA  
84 27. Core Immunology Laboratory Division of Experimental Medicine, University of California  
85 San Francisco, CA  
86 28. Institute for Human Genetics, University of California San Francisco, CA  
87 29. Biomedical Sciences Graduate Program, University of California San Francisco, CA  
88 30. Department of Biochemistry and Biophysics, University of California San Francisco, CA  
89 31. Weill Institute for Neurosciences, Department of Neurology, University of California San  
90 Francisco  
91 32. Department of Epidemiology and Biostatistics, University of California San Francisco,  
92 CA  
93 33. Institute of Computational Health Sciences, University of California San Francisco, CA  
94

## 95 Introduction

96 The acute respiratory distress syndrome (ARDS) is a clinical condition characterized by  
97 noncardiogenic pulmonary edema and hypoxemia within one week of a physiologic insult<sup>1</sup>. This  
98 broad clinical definition encompasses a heterogeneous population of critically ill patients,  
99 including those with direct pulmonary injury from pneumonia or aspiration and those with  
100 indirect pulmonary injury caused by dysregulated systemic inflammation from sepsis,  
101 pancreatitis, or trauma. The global incidence of ARDS has surged during the COVID-19  
102 pandemic, increasing the importance of finding effective treatments. While some pharmacologic  
103 treatments have decreased mortality in mechanically ventilated patients with COVID-19<sup>2,3</sup>, no  
104 drug has consistently reduced mortality in more typical heterogeneous cohorts of patients with  
105 ARDS. There is a growing recognition that biological heterogeneity within the syndrome is a  
106 significant barrier to identifying effective treatments<sup>4</sup>.

107 Two clinically distinct molecular phenotypes of ARDS (termed “hyperinflammatory” and  
108 “hypoinflammatory”) have been identified using latent class analysis of clinical and plasma  
109 biomarker data in five clinical trial cohorts and three observational studies<sup>1,5-11</sup>. The  
110 hyperinflammatory phenotype is characterized by elevated plasma inflammatory cytokines (IL-8,  
111 IL-6, TNF $\alpha$ ), lower plasma Protein C and bicarbonate, and higher 90-day mortality compared  
112 to the hypoinflammatory phenotype. Differences between phenotypes are not primarily  
113 explained by the physiologic insult that caused ARDS (e.g. sepsis, pneumonia, aspiration of  
114 gastric contents). Importantly, significant differences in treatment response to simvastatin,  
115 ventilator settings, and fluid management have been observed across molecular phenotypes in  
116 retrospective analyses of three ARDS clinical trials<sup>5-7</sup>; further, in patients with COVID-19-related  
117 ARDS, hyperinflammatory patients may preferentially respond to corticosteroid treatment<sup>12,13</sup>.  
118 These results suggest that understanding and targeting the heterogeneous biology underlying  
119 ARDS molecular phenotypes is essential to identifying effective new treatments for ARDS.  
120 Prospective studies designed to identify these phenotypes using parsimonious models are  
121 laying the groundwork for precision clinical trials<sup>4,14</sup>.

122 Despite this exciting progress, a critical barrier to developing new therapies for ARDS is  
123 our superficial understanding of the biological pathways characterizing each phenotype. This  
124 knowledge gap was recently cited by an NHLBI workshop on precision medicine in ARDS as a  
125 top research priority for the field<sup>4</sup>. To date, analyses of the biological differences between these  
126 phenotypes have been limited to circulating biomarkers in plasma or blood, largely due to the  
127 relative ease of sampling. Understanding the biological differences between ARDS phenotypes  
128 in the lung will be critical to development of informative pre-clinical models of disease and

129 targeted treatments for ARDS. Here, we employ a systems biology approach incorporating bulk  
130 and single-cell RNA-sequencing, metagenomics, and proteomics to understand differences in  
131 lung immunology, microbiology, and systemic inflammatory responses between ARDS  
132 phenotypes.

133

## 134 **Results**

### 135 **Patient enrollment and ARDS phenotype assignment**

136 To determine if previously identified ARDS phenotypes are associated with differences  
137 in pulmonary biology, we first studied tracheal aspirates (TA) collected from the Acute Lung  
138 Injury in Critical Illness study, a prospective, observational cohort of mechanically ventilated  
139 patients admitted to the ICU at the University of California San Francisco Medical Center  
140 (UCSFMC). Patients were enrolled in this cohort from July 2013 until March 2020, when  
141 enrollment was paused due to the COVID-19 pandemic. 77 out of 323 participants had ARDS in  
142 this cohort (Supplementary Figure 1). TA host sequencing was available for 41 of the ARDS  
143 participants. In addition, we had TA sequencing from five participants who were intubated for  
144 neurologic injury, had no evidence of pulmonary disease on chest x-ray (CXR), and were not  
145 immunosuppressed. We used a previously validated three-variable classifier model to determine  
146 ARDS molecular phenotype based on plasma IL-8, bicarbonate, and Protein C levels<sup>14</sup>. When  
147 plasma biomarkers were unavailable from the day of TA collection (n=5), we used a recently  
148 described and validated machine learning model to assign phenotype<sup>11,15</sup>. 10 out of 41 ARDS  
149 subjects (24%) had hyperinflammatory ARDS, which is consistent with the proportion of  
150 hyperinflammatory subjects observed in previous studies<sup>5-9</sup>. There were four extrapulmonary  
151 fungal infections (two *C. albicans*, one *C. glabrata*, and one *H. capsulatum*) in the  
152 hyperinflammatory phenotype vs. zero in the hypoinflammatory phenotype ( $p < 0.01$ , Table 1).  
153 There were no significant differences in patient age, sex, BMI, immunosuppression, or ARDS  
154 risk factors between the groups.

155

### 156 **TA RNASeq identifies increased pro-inflammatory cytokine signaling and increased 157 stress response in hyperinflammatory ARDS**

158 We sequenced TA using established methods<sup>16</sup> and used *DESeq2*<sup>17</sup> and *apegI*<sup>18</sup> to  
159 compare TA gene expression between ARDS molecular phenotypes. 1,334 genes (7% of all  
160 protein-coding genes) were differentially expressed between ARDS phenotypes at a false  
161 detection rate (FDR)  $< 0.1$  and absolute empirical Bayesian posterior  $\log_2$ -fold change  $> 0.5$   
162 (Supplementary Figure 2A, Supplementary Data 1A).

163 We next used Ingenuity Pathway Analysis (IPA)<sup>19</sup> Upstream Regulator analysis to  
164 analyze differentially expressed genes. This analysis predicts whether measured gene  
165 expression is consistent with activation or inhibition of upstream regulators of gene expression,  
166 which include cytokines, receptors, transcription factors, enzymes, endogenous chemicals, and  
167 drugs. IPA predicted increased activation of several cytokines and other upstream regulators of  
168 differentially expressed genes in hyperinflammatory ARDS (Figure 1.A.i, Supplementary Data  
169 2A). Predicted upstream regulators included several pro-inflammatory cytokines that were  
170 previously found to be elevated in plasma of patients with hyperinflammatory ARDS, including  
171 IL1B, IL6, and TNF. In addition, IPA identified activation of several cytokines that were not  
172 previously associated with hyperinflammatory ARDS, including several interferons; IL2 and  
173 IL15, which stimulate cytotoxic T cell and NK cell responses<sup>20</sup>; and the chemokine ligand  
174 CCL2/MCP-1. In addition, upstream regulator analysis predicted increased activation of the  
175 integrated stress response (XBP1, NFE2L2), T cell activation (CD3, CD28), stimulation of Toll-  
176 like receptors (TLR2, TLR3, TLR4, TLR7, TLR9), a metabolic shift to glycolysis (MLXILP), and  
177 increased cellular differentiation (MYC, NONO) in hyperinflammatory ARDS (Figure 1.A.ii-iv,  
178 Supplementary Data 2A). Because there was a significant difference in fungal infections  
179 between phenotypes, we performed a sensitivity analysis adjusting for systemic fungal  
180 infections. 997 genes were differentially expressed between phenotypes (711 genes overlapped  
181 with the unadjusted analysis), and pathway analysis identified similar upstream regulators of  
182 gene expression (Supplementary Figure 2, Supplementary Data 1B, Supplementary Data 2B).  
183 Together, these analyses identify several novel pathways that are differentially regulated  
184 between ARDS molecular phenotypes and support the hypothesis that previously described  
185 differences in systemic inflammation are associated with marked differences in respiratory tract  
186 biology

187 To further understand how pathways in each phenotype were dysregulated compared to  
188 mechanically ventilated lungs, we next performed differential expression and pathway analyses  
189 comparing each phenotype to five mechanically ventilated control samples (Figure 1B and 1C,  
190 Supplementary Data 1C and 1D). 2,989 genes (15% of protein-coding genes) were differentially  
191 expressed between hyperinflammatory ARDS participants and controls, while 2,132 genes  
192 (11% of all protein-coding genes) were differentially expressed between hypoinflammatory  
193 ARDS and controls. Notably, this analysis identified several cytokines that were activated in  
194 both hyperinflammatory ARDS and hypoinflammatory ARDS compared to controls, including  
195 IL1B, TNF, and IFNG. While this analysis identified some similarities between phenotypes, we  
196 also identified several upstream regulators that were only significantly upregulated in

197 hyperinflammatory ARDS (Supplementary Data 2C and 2D), including IL-17C, a member of the  
198 IL-17 family secreted by airway epithelial cells<sup>21</sup>; several Type I/Type III interferons; FAS, which  
199 stimulates apoptosis<sup>22</sup>; TICAM/MyD88 signaling, which are downstream effectors of Toll-like  
200 receptors<sup>23,24</sup>; and the T-cell receptor, suggesting these pathways play a role in the distinct  
201 biology of hyperinflammatory ARDS.

202

### 203 **LPS models of acute lung injury replicate gene expression in hyperinflammatory ARDS**

204 Upstream regulator analysis identified LPS, a component of Gram-negative bacteria, as  
205 a candidate upstream regulator of genes differentially expressed between ARDS phenotypes  
206 (Supplementary Data 2A). LPS was also identified as an upstream regulator of gene expression  
207 in comparisons of each ARDS phenotype to controls (Supplementary Data 2B, Supplementary  
208 Data 2C). LPS is a potent stimulator of NF- $\kappa$ B signaling via TLR4 and MyD88<sup>25</sup> and is frequently  
209 used in experimental models of acute lung injury (ALI)<sup>26</sup> thus, we hypothesized that genes  
210 upregulated in experimental models of lung injury would be enriched in genes that were  
211 upregulated in hyperinflammatory ARDS compared to controls but would be relatively less  
212 enriched in genes upregulated in hypoinflammatory ARDS compared to controls. Respiratory  
213 tract gene expression data was available from four LPS models of ARDS in the Gene  
214 Expression Omnibus. We also identified 17 more datasets from other experimental models of  
215 ARDS including ventilator-induced lung injury (VILI), ozone, hyperoxia, Pam3Cys (a TLR2  
216 agonist), and hemorrhagic shock (Supplementary Data 3A). We used GEO2Enrich<sup>27</sup> to identify  
217 gene sets that were differentially expressed in lung injury compared to controls in experimental  
218 models. We then used *gsva* to calculate a expression score for each of these gene sets in TA  
219 samples and used *limma* to compare expression of these gene sets in each ARDS phenotype to  
220 controls (Figure 1D, Supplementary Data 3B and 3C). Gene sets from four models were  
221 significantly enriched (FDR < 0.1) in TA from both ARDS phenotypes. As expected, LPS models  
222 had a significant overlap with both phenotypes, but LPS experimental gene sets had higher  
223 GSVA scores in hyperinflammatory participants. In addition, gene sets from five experimental  
224 models (two ozone models, two LPS models, and one VILI model) were enriched in  
225 hyperinflammatory ARDS, but were not enriched in hypoinflammatory ARDS, suggesting these  
226 models better replicate dysregulated gene expression observed in the hyperinflammatory  
227 phenotype.

228

229

## 230 **Transcriptomes identify candidate drugs for hyperinflammatory ARDS**

231 To identify candidate treatments for each ARDS phenotype, we next used IPA's  
232 Upstream Regulator Analysis to identify drugs that were predicted to shift gene expression from  
233 each ARDS phenotype toward control subjects. This approach has been used to identify drugs  
234 that can be tested in experimental models and clinical systems, and we have previously used  
235 this approach to identify candidate treatments for COVID-19 ARDS.<sup>16,28</sup> This *in silico* analysis  
236 identified several drugs predicted to shift gene expression in the hyperinflammatory phenotype  
237 toward ventilated controls (Figure 1.E.i, Supplementary Data 2B), while fewer drugs were  
238 predicted to shift gene expression in hypoinflammatory ARDS toward controls (Figure 1.E.ii,  
239 Supplementary Data 2C). Interestingly, our analysis also identified drugs predicted to shift gene  
240 expression from control mechanically ventilated patients toward ARDS phenotypes. For  
241 example, nitrofurantoin, amiodarone, and cytarabine, all of which cause drug-induced  
242 pneumonitis, were predicted to shift gene expression from controls toward the  
243 hyperinflammatory phenotype (Figure 1.E.ii).

244

## 245 **TA immune cells are distinctly polarized in hyperinflammatory ARDS**

246 To identify the sources of differential gene expression identified in bulk RNA sequencing  
247 data, we used a neutrophil-preserving single-cell RNA sequencing (scSeq) pipeline to study TA  
248 from eight COVID-negative patients with ARDS enrolled in a separate prospective,  
249 observational cohort, the COVID-19 Multiphenotyping for Effective Therapies (COMET) study.  
250 TA scSeq was available from six participants with hypoinflammatory ARDS and two participants  
251 with hyperinflammatory ARDS. 18,717 cells passed quality control filters (3,782 from  
252 hyperinflammatory ARDS, Figure 2A). We determined cell identities using SingleR<sup>29</sup> to compare  
253 cell transcriptomes to signatures derived from the Human Primary Cell Atlas (Figure 2B).  
254 Neutrophils were the most common cell type identified in TA from both phenotypes (48% of  
255 hyperinflammatory TA cells and 36% of hypoinflammatory TA cells, Figure 2C), which  
256 highlighted the importance of using neutrophil-preserving methods to study ARDS phenotypes.

257 To identify cell-specific differences between ARDS phenotypes, we used *MAST* to fit  
258 mixed effects models of differential gene expression ( $FDR < 0.1$ )<sup>30</sup>. To address  
259 pseudoreplication bias and account for within-subject correlation in gene expression<sup>31</sup>, we  
260 modeled ARDS phenotype as a fixed effect and each subject as a random effect. 231 genes  
261 were differentially expressed between phenotypes in TA neutrophils (Figure 2.D.i,  
262 Supplementary Data 4A). CCL2/MCP-1, which synergistically promotes neutrophil migration  
263 with IL-8 and is elevated in bronchoalveolar lavage (BAL) fluid from LPS-challenged volunteers

264 and patients with ARDS<sup>32</sup>, was identified as an upstream regulator of neutrophil gene  
265 expression in hyperinflammatory ARDS (Figure 2.D.ii, Supplementary Data 5A). In addition,  
266 upstream regulator analysis predicted increased activation of MYC, a key mediator of  
267 granulopoiesis<sup>33</sup>, and MLXIPL, which promotes glycolysis<sup>34</sup>, in hyperinflammatory neutrophils  
268 (Figure 2.D.iii, Supplementary Data 5A). Notably, increased glycolytic activity has previously  
269 been reported in LPS-stimulated neutrophils<sup>35</sup>. In contrast to our bulk RNASeq analysis,  
270 upstream regulator analysis predicted relatively higher activation of several proinflammatory  
271 cytokines, including TNF, IL6, and IFNG, in hypoinflammatory neutrophils.

272 Next, we investigated differences in monocytes and macrophages in ARDS phenotypes.  
273 189 genes were differentially expressed between 690 hyperinflammatory monocytes and  
274 3802 hypoinflammatory monocytes (Figure 2.E.i, Supplementary Data 4B) while 339 genes  
275 were differentially expressed in 296 monocyte-derived macrophages (MDM) from  
276 hyperinflammatory ARDS and 1,930 MDM from hypoinflammatory ARDS (Figure 2.F.i,  
277 Supplementary Data 4C). Only 15 genes were differentially expressed in alveolar macrophages  
278 (Supplementary Data 4D), which was insufficient for pathway analysis and suggested these  
279 cells played less of a role in differences between ARDS phenotypes. As in the neutrophils, IPA  
280 predicted relatively higher activation of several pro-inflammatory cytokines in hypoinflammatory  
281 ARDS, including TNF, IL1B, and IFNG, in monocytes and MDM, while two canonical Type 2  
282 cytokines, IL4 and IL13, were predicted to be activated in hyperinflammatory ARDS for both cell  
283 types (Figure 2.E.ii and 2.F.ii, Supplementary Data 5B and 5C). As in the bulk RNASeq data, we  
284 observed higher activation of NFE2L2, which protects against oxidative stress and inhibits the  
285 NLRP3 inflammasome<sup>37</sup> in monocytes and MDM from hyperinflammatory ARDS (Figure 2.E.iii  
286 and Figure 2.F.iii).

287 We next compared gene expression in T cells and found 281 genes that were  
288 differentially expressed between 477 T cells from hyperinflammatory ARDS and 1,665 T cells  
289 from hypoinflammatory ARDS (Figure 2.G.i, Supplementary Data 4E). IPA identified activation  
290 expression of interferon, TLR4, and NF-KB stimulated genes in T cells from the  
291 hyperinflammatory phenotype (Figure 2.G.ii, Supplementary Data 5D), which was consistent  
292 with the pattern observed in bulk RNA sequencing and suggested these T cells were T<sub>h</sub>1  
293 polarized. IPA also predicted increased activation of cell differentiation markers (NONO) and  
294 activation of the integrated stress response (XBP1, EIF2AK2) in T cells from the  
295 hyperinflammatory phenotype (Figure 2.G.iii, Supplementary Data 5D).

296 We used *connectome*<sup>38</sup>, which compares single-cell gene expression to the FANTOM5  
297 ligand-receptor database<sup>39</sup>, to identify ligand-receptor pairs in lower respiratory cells that were



298 unique to each ARDS phenotype (Supplementary Data 6A and 6B). Several ligand-receptor  
299 pairs were observed in hyperinflammatory ARDS but were not present in hypoinflammatory  
300 ARDS (Supplementary Figure 3). For example, *IFNG* from T and NK cells and *IFNGR2* on MDM  
301 were identified as a distinct ligand-receptor pair in hyperinflammatory ARDS, suggesting these  
302 cells play a key role in the dysregulated pathways identified in bulk and single-cell differential  
303 expression analyses. Together, our scSeq analyses confirm that TA immune cells have distinct  
304 transcriptomic profiles in each ARDS phenotype.

305

### 306 **Plasma proteomic analysis identifies additional cytokines that are upregulated in** 307 **hyperinflammatory ARDS**

308 To further validate the biologic relevance of the TA findings, we used the O-Link Target  
309 96 Inflammation panel to measure plasma protein biomarker concentrations. 21 participants  
310 included in the TA bulk sequencing analysis also had plasma O-link data available. In addition,  
311 proteomic data was available for four participants from the same cohort who did not have TA  
312 bulk sequencing available for analysis. Of the 25 included participants, five had  
313 hyperinflammatory ARDS and 20 had hypoinflammatory ARDS. We also measured plasma  
314 protein concentrations in 14 healthy volunteers on the same O-link plate.

315 Plasma concentrations of 28 proteins were higher in hyperinflammatory ARDS than in  
316 hypoinflammatory ARDS (FDR < 0.1, Figure 3A). Some of these biomarkers confirmed known  
317 differences between phenotypes, including higher concentrations of IL6 and TNF in  
318 hyperinflammatory ARDS. In addition, we identified nine plasma protein biomarkers notably  
319 higher in hyperinflammatory ARDS over controls (Figure 3B) but not higher in hypoinflammatory  
320 ARDS compared to controls (Figure 3C), suggesting they identify distinctly dysregulated  
321 pathways in the hyperinflammatory phenotype. These proteins included IL-8, which is one of the  
322 cytokines that defines the hyperinflammatory phenotype; CASP-8, an effector of FAS  
323 signaling<sup>40</sup>; the interferon gamma (IFN $\gamma$ ) induced proteins CXCL9 and CXCL10<sup>41</sup>; plasma  
324 urokinase (uPA); oncostatin M; and adenosine deaminase (ADA). In addition, CCL2/MCP-1 and  
325 the T cell activation marker CD5<sup>42</sup> were higher in hyperinflammatory ARDS and in controls  
326 compared to hypoinflammatory ARDS. These observations were consistent with observed  
327 differences in TA gene expression at both the bulk RNASeq and scSeq level, particularly  
328 increased CCL2 and FAS activity, IFN $\gamma$ -stimulated gene expression, and T cell activation in  
329 hyperinflammatory ARDS.

330

331

## 332 **Phenotypes were associated with differences in the respiratory microbiome**

333           Because our analyses demonstrated significant differences in host respiratory tract  
334 biology in each phenotype, we hypothesized that each phenotype would have a distinct  
335 respiratory microbiome that could stimulate a dysregulated response. We used a previously  
336 described metagenomic sequencing pipeline to align non-human sequences in TA sequencing  
337 to microbial genomes<sup>43</sup> and used established methods to filter background contamination from  
338 samples<sup>44</sup>. Taxa were aggregated at the genus level for downstream analyses. There was no  
339 significant difference in alpha diversity between phenotypes for all microbial taxa, bacteria, or  
340 fungi (Figure 4A). There was a significant difference in microbial community composition  
341 between phenotypes (Bray-Curtis distance, PERMANOVA  $p = 0.001$ , Figure 4B). This  
342 difference was not significant when the analysis was restricted to bacterial taxa ( $p = 0.117$ ,  
343 Figure 4C), but was significant when the analysis was restricted to fungal taxa ( $p = 0.004$ ,  
344 Figure 4D). We next compared differential abundance of microbial transcripts using  
345 *metagenomeSeq*<sup>45</sup>. We found increased abundance of *Candida* in TA from patients with  
346 hyperinflammatory ARDS (Figure 4E). In addition, we observed greater abundance of multiple  
347 bacterial taxa in the hypoinflammatory phenotype, including *Escherichia*, *Proteus*, and  
348 *Citrobacter*, three taxa in the *Enterobacteriaceae* family, which was associated with an increased  
349 risk of ARDS in a cohort of trauma patients<sup>46</sup>. Together, these observations support the  
350 hypothesis that there is a significant difference in microbial community composition between  
351 ARDS phenotypes.

352

## 353 **Discussion**

354           In this study, we performed an integrated transcriptomic and proteomic analysis of  
355 ARDS phenotypes. To our knowledge, this represents the first demonstration of differences in  
356 pulmonary biology between molecular phenotypes of ARDS, which have previously been  
357 characterized primarily using plasma biomarkers. We identified differences between phenotypes  
358 in bulk RNA transcriptomes and used scSeq to identify distinctly polarized immune cells in the  
359 TA. In addition, O-Link proteomics identified differences in plasma protein concentrations  
360 consistent with these observations. We also found significant differences in the TA microbial  
361 community composition between phenotypes. Our findings support the hypothesis that each  
362 ARDS phenotype has distinct pulmonary pathobiology and may be more likely to respond to  
363 treatments specifically targeting these dysregulated pathways.

364           Here, we find hyperinflammatory ARDS was associated with markedly higher IFN $\gamma$   
365 stimulated gene expression and T cell activation in TA. In bulk RNA sequencing, pathway

366 analysis identified markedly higher expression of IFN $\gamma$  stimulated genes and increased  
367 expression of genes stimulated by the T cell receptor. Plasma proteomics identified increased  
368 concentrations of the IFN $\gamma$ -stimulated proteins CXCL9 and CXCL10 and the T cell activation  
369 marker CD5 in hyperinflammatory ARDS but not in hypoinflammatory ARDS. Notably, in an  
370 alternative molecular phenotyping approach that used *k*-means clustering of plasma biomarkers  
371 to categorize ARDS subjects into two molecular phenotypes (“reactive” and “uninflamed”),  
372 plasma IFN $\gamma$  is one of the defining biomarkers of the higher mortality “reactive” phenotype<sup>47</sup>.  
373 Together, our analyses support a central role of IFN $\gamma$  and T cell activation in hyperinflammatory  
374 ARDS.

375 We used scSeq to identify cell-specific differences in immune responses. We found  
376 evidence of increased neutrophil migration and differentiation in hyperinflammatory ARDS.  
377 MDM from the higher-mortality hyperinflammatory phenotype expressed fewer pro-inflammatory  
378 genes, which is consistent with a prior analysis showing decreased pro-inflammatory gene  
379 expression in BAL macrophages collected on the day of intubation was associated with  
380 increased mortality in a cohort of ARDS patients<sup>48</sup>. In contrast, T cells demonstrated higher  
381 interferon-stimulated gene expression in hyperinflammatory ARDS. Interestingly, this pattern of  
382 high interferon-stimulated gene expression in T cells but diminished immune responses in  
383 macrophages has also been reported in severe COVID-19<sup>49</sup>. These findings suggest  
384 dysregulated responses to immune signaling in specific cell populations may drive inflammation  
385 in hyperinflammatory ARDS.

386 The interplay of the respiratory microbiome, lung injury, and ARDS has long been  
387 hypothesized but remains an important knowledge gap in the field. In one experimental study,  
388 changes in the respiratory microbiome mediated lung injury<sup>50</sup>, however, a small prior study  
389 using 16S sequencing of mini-BAL specimens found no difference in the microbiome  
390 composition between phenotypes<sup>51</sup>. Because we used metatranscriptomic sequencing, we were  
391 able to identify non-bacterial taxa present in TA samples. We identified significant differences in  
392 microbial community composition between phenotypes and more transcripts from *Candida* in  
393 hyperinflammatory ARDS. Decreased fungal diversity in the respiratory tract has previously  
394 been associated with increased organ dysfunction and shock in patients with ARDS<sup>52</sup>, and an  
395 increased burden of BAL *Candida* is associated with worse outcomes in ventilated patients with  
396 COVID<sup>53</sup>. Prior studies have also shown an association between *Enterobacteriaceae* and a risk  
397 of developing ARDS<sup>46,54</sup>; in our analysis, three genera in *Enterobacteriaceae* (*Escherichia*,  
398 *Proteus*, and *Citrobacter*) were more abundant in hypoinflammatory ARDS than  
399 hyperinflammatory ARDS. While *Candida* can stimulate the dysregulated pathways observed in

400 hyperinflammatory ARDS<sup>55</sup>, further research is required to determine if the respiratory  
401 microbiome causes (or, alternatively, results from) inflammation in hyperinflammatory ARDS,  
402 and, if the association is causal, which taxa are responsible for lung injury.

403 We compared differentially expressed genes in clinical samples to experimental ALI  
404 models. A prior analysis comparing rodent ALI models to human LPS challenge models found a  
405 significant overlap in gene expression between animal and human experimental systems<sup>56</sup>. An  
406 experimental model combining intratracheal LPS *and* mechanical ventilation was the murine  
407 model with the strongest overlap in gene expression with ARDS subjects in both phenotypes.  
408 This gene signature was from an experiment demonstrating that a combined MV/LPS model  
409 generated markedly higher neutrophilic inflammation in the lung than LPS or MV alone<sup>57</sup>. These  
410 observations suggest a two-hit model reproduces important biological changes observed in  
411 ARDS. In addition, gene signatures from five models were enriched in hyperinflammatory ARDS  
412 but were not enriched in hypoinflammatory ARDS, suggesting these models did not replicate  
413 respiratory tract biology of the latter group. These observations may partially explain why  
414 therapies that appear promising in pre-clinical models are not effective in more heterogeneous  
415 clinical trial populations.

416 Our results provide further evidence that ARDS molecular phenotypes identify  
417 biologically-important differences in immune biology, and have several important implications for  
418 developing a precision approach to treating ARDS<sup>4</sup>. Pathway analyses identified different drugs  
419 that were predicted to shift gene expression from ARDS toward ventilated controls in each  
420 phenotype. These candidate therapies require further investigation in pre-clinical models, and  
421 our results also demonstrate that some experimental models are more effective at reproducing  
422 changes in gene expression observed in clinical samples in each phenotype. Future preclinical  
423 studies and RCTs must account for this biological heterogeneity.

424 Strengths of this study include transcriptomic analysis of samples from the focal organ of  
425 injury in ARDS, providing a highly detailed picture of the pulmonary biology of both ARDS  
426 phenotypes, and validation of these observations with metatranscriptomics, single-cell  
427 sequencing, and peripheral blood proteomics. In addition, the inclusion of non-ARDS ventilated  
428 controls allowed us to further characterize the physiologic dysregulation in the phenotypes,  
429 rather than defining gene expression relative to another pathologic state. This approach also  
430 allowed us to compare our clinical samples to experimental models and identify candidate  
431 medications that may be suitable for clinical trials in each phenotype.

432 This analysis also has some limitations. The sample size for each analysis is modest;  
433 however, it was adequately powered to detect large changes in gene expression and protein

434 concentrations. We performed CD45<sup>+</sup> selection for scSeq samples, which allowed us to isolate  
435 hematopoietic immune cells, including neutrophils, but selected against epithelial cells, which  
436 generate important signals in our bulk RNASeq and plasma protein analyses and likely play a  
437 important role in ARDS phenotype biology. In addition, while TA contains fluid from the distal  
438 airspaces<sup>58</sup>, and we have previously shown that TA and BAL isolate similar immune cells<sup>16</sup> and  
439 microbiota<sup>59</sup>, it is possible that more invasive BAL testing may identify additional differences  
440 between the phenotypes. Future analyses should include larger cohorts to replicate these  
441 findings and determine if TA sequencing or plasma cytokines more accurately predict clinical  
442 trajectory and response to treatment.

443 In conclusion, an integrated, multi-omic analysis of ARDS molecular phenotypes defined  
444 by plasma protein biomarkers suggests the hyperinflammatory phenotype is characterized by  
445 marked differences in TA gene expression, metagenomics, and plasma proteins. Our findings  
446 suggest the respiratory tract biology of these phenotypes is distinct and further supports the use  
447 of molecular phenotypes to study acute lung injury biology and develop new treatments for  
448 ARDS.

|                                   | Hyperinflammatory | Hypoinflammatory  | P (1) | Control       | P (2) | P (3) |
|-----------------------------------|-------------------|-------------------|-------|---------------|-------|-------|
| N                                 | 10                | 31                |       | 5             |       |       |
| <b>Age</b>                        | 66 [56, 72]       | 63 [51, 70]       | 0.63  | 66 ± 23       | 0.85  | 0.42  |
| <b>Female</b>                     | 4 (40)            | 21 (68)           | 0.95  | 3 (60)        | 0.26  | 0.49  |
| <b>BMI (kg/m<sup>2</sup>)</b>     | 25.0 [23.6, 25.6] | 25.9 [23.9, 32.2] | 0.27  | 25.7 ± 4.8    | 0.24  | 0.23  |
| <b>Vasopressors at enrollment</b> | 9 (90)            | 19 (61)           | 0.19  | 1 (20)        | <0.01 | 0.21  |
| <b>IL-8, pg/ml</b>                | 424 [228, 1068]   | 15 [9, 25]        | <0.01 | 10 [8, 11]    | <0.01 | 0.21  |
| <b>Protein C, % control</b>       | 51 [31, 62]       | 103 [76, 132]     | <0.01 | 115 [79, 148] | <0.01 | 0.76  |
| <b>Immunosuppression</b>          | 4 (40)            | 6 (19)            | 0.37  |               |       |       |
| <b>Primary ALI Risk Factor</b>    |                   |                   | 0.79  |               |       |       |
| <i>Pneumonia</i>                  | 4 (40)            | 16 (48)           |       |               |       |       |
| <i>Sepsis</i>                     | 4 (40)            | 7 (23)            |       |               |       |       |
| <i>Aspiration</i>                 | 2 (20)            | 6 (23)            |       |               |       |       |
| <i>Pancreatitis</i>               | 0 (0)             | 1 (3)             |       |               |       |       |
| <i>None</i>                       | 0 (0)             | 1 (3)             |       |               |       |       |
| <b>Clinical microbiology*</b>     |                   |                   |       |               |       |       |
| <i>Respiratory virus</i>          | 1 (10)            | 1 (3)             | 0.98  |               |       |       |
| <i>Respiratory bacteria</i>       | 3 (30)            | 11 (36)           | 1.00  |               |       |       |
| <i>Extrapulmonary bacteria</i>    | 3 (30)            | 5 (16)            | 0.62  |               |       |       |
| <i>Extrapulmonary fungus</i>      | 4 (40)            | 0 (0)             | <0.01 |               |       |       |

449 **Table 1:** Characteristics of patients included in differential expression analysis of ARDS phenotypes from the Acute Lung Injury in  
450 Critical Illness cohort. Normally distributed values are reported as mean ± SD. Non-normally distributed values are reported as  
451 median [IQR]. Categorical data are reported as N (% of total for category). P-values are for a t-test for normally distributed  
452 continuous data, Wilcoxon rank-sum for non-normally distributed, and chi-square test for categorical data. P values are for (1)  
453 hyperinflammatory ARDS vs. hypoinflammatory ARDS; (2) hyperinflammatory ARDS vs. controls; (3) hypoinflammatory ARDS vs.  
454 controls. \*No subjects in this cohort had a systemic viral infection or respiratory fungal infection.

## 455 Captions

456

457 **Figure 1:** Bulk RNA sequencing analyses of TA collected in the Acute Lung Injury in Critical  
458 Illness cohort.

459

460 A-C) Differential gene expression and IPA upstream regulator scores in TA. A) 10  
461 hyperinflammatory ARDS participants vs. 31 hypoinflammatory ARDS participants. B) 10  
462 hyperinflammatory ARDS participants vs. five hypoinflammatory ARDS participants. C) 31  
463 hypoinflammatory ARDS participants vs. five control participants.

464

465 For each comparison: (i) volcano plot of differential gene expression, where the  $\log_2$  fold  
466 difference is on the x-axis and the  $-\log_{10}$  adjusted p-value is on the y-axis; (ii-iv) IPA upstream  
467 regulator z-scores for (ii) cytokines, (iii) transmembrane and nuclear receptors, and (iv)  
468 transcription regulators in the IPA database. A maximum of 20 significant upstream regulators  
469 are shown for each panel. Redundant upstream regulators (e.g. inteferons or interleukins in the  
470 same family) were omitted from the figure. For a complete list of upstream regulator scores, see  
471 Supplementary Data 2.

472

473 D) Gene set variation analysis for experimental models of lung injury. We identified 21 models  
474 of acute lung injury in the Gene Expression Omnibus and used GEO2Enrichr to identify up to  
475 200 genes differentially expressed ( $FDR < 0.05$ ) in the experimental model compared to  
476 controls. GSVA scores were calculated for each sample, and the difference between  
477 hyperinflammatory ARDS and controls (orange) and hypoinflammatory ARDS and controls  
478 (blue) was estimated with limma. Experimental gene sets that are significantly different from  
479 controls are shown with solid triangles, while gene sets that are not significant are shown with  
480 transparent circles. For each model, the GEO Accession Number, organism, and lung injury  
481 model are listed on the x-axis.

482

483 E) IPA Upstream Regulator Analysis scores for selected drugs in the IPA database for (i)  
484 hyperinflammatory ARDS vs. controls, and (ii) hypoinflammatory ARDS vs. controls. A positive  
485 z-score indicates the drug is predicted to shift gene expression from ventilated lungs toward  
486 ARDS lungs, while a negative score indicates the drug is predicted to shift gene expression  
487 from ARDS towards controls. Upstream regulators that did not meet statistical significance  
488 criteria are displayed using a transparent dot.

489

490 **Figure 2:** Single-cell RNA sequencing from TA in the COMET cohort. A) Seurat UMAP  
491 projection of 18,717 TA cell transcriptomes from two participants with hyperinflammatory ARDS  
492 and six participants with hypoinflammatory ARDS, annotated with cell type as predicted by  
493 SingleR. B) UMAP projection of TA cells transcriptomes separated by ARDS phenotype. C) Bar  
494 plot of cell proportions in each phenotype.

495

496 D-G) Differential expression and pathway analyses for D) Neutrophils, E) Monocytes, F)  
497 Monocyte-derived macrophages, and G) T cells. For each cell type: (i) volcano plot of  
498 differential gene expression. A positive fold change indicates the gene is more highly expressed  
499 in hyperinflammatory ARDS. (ii) IPA upstream regulator scores for cytokines and (iii) IPA  
500 upstream regulator scores for the top 40 non-cytokine regulators of gene expression. A positive  
501 z-score indicates the cytokine is predicted to be more active in hyperinflammatory ARDS  
502 compared to hypoinflammatory ARDS.

503

504 **Figure 3:** O-Link proteomics results for plasma biomarkers from 5 hyperinflammatory ARDS, 20  
505 hypoinflammatory ARDS, and 14 control participants. Each heatmap shows plasma protein

506 biomarkers that were significantly different between groups (FDR < 0.1); for a complete list of  
507 proteins, see Supplementary Data 7. Each column represents an individual subject and each  
508 row shows the z-scaled concentrations. Rows and columns are clustered using the Euclidean  
509 distance. Columns are annotated by phenotype (orange is hyperinflammatory, blue is  
510 hypoinflammatory, and green is healthy volunteer). Z-score for expression is shown on the color  
511 bar on the right, and the scale is the same across all three heatmaps. A) Hyperinflammatory  
512 ARDS vs. hypoinflammatory ARDS. B) Hyperinflammatory ARDS vs. healthy volunteers. C)  
513 Hypoinflammatory ARDS vs. healthy volunteers.

514  
515 **Figure 4:** Results of metatranscriptomic sequencing analyses of TA from 31 subjects with  
516 hypoinflammatory ARDS and 10 subjects with hyperinflammatory ARDS from the Acute Lung  
517 Injury in Critical Illness cohort. All analyses are performed with metatranscriptomic data  
518 aggregated at the genus level. A) Shannon diversity index for each TA sample, shown for all  
519 taxa, bacteria, and fungi. Each point represents an individual participant. P-value for Wilcoxon  
520 rank-sum test. B-D) Principal components analysis of metatranscriptomic reads mapped to all  
521 taxa, bacteria, or fungi in TA. Each point represents an individual subject. Subjects with  
522 systemic fungal infections are identified with triangles. Ellipses show the 95% confidence  
523 interval around the centroid. PERMANOVA for Bray-Curtis dissimilarity was calculated using  
524 adonis2 in vegan. D) Volcano plot showing differential abundance for TA metatranscriptomes.  
525 Genera that are significantly higher in hyperinflammatory ARDS are in orange and genera that  
526 are significantly higher in hypoinflammatory ARDS are in blue.

527  
528 **Supplementary data 1:** Differential gene expression for pairwise comparisons of bulk RNA  
529 gene expression for TA in the Acute Lung Injury in Critical Illness cohort. A positive log<sub>2</sub> fold  
530 difference indicates the gene is more highly expressed in the first group compared to second  
531 group for each comparison. A) Hyperinflammatory ARDS vs. hypoinflammatory ARDS; B)  
532 Hyperinflammatory ARDS vs. controls; and C) Hypoinflammatory ARDS vs. controls; and D) All  
533 ARDS subjects vs. controls.

534  
535 **Supplementary data 2:** IPA Upstream Regulator scores for pairwise comparisons of bulk RNA  
536 gene expression for TA in the Acute Lung Injury in Critical Illness Cohort. A positive z-score  
537 indicates gene expression is consistent with higher activity of the upstream regulator in the first  
538 group compared to second group for each comparison. A) Hyperinflammatory ARDS vs.  
539 hypoinflammatory ARDS; B) Hyperinflammatory ARDS vs. controls; C) Hypoinflammatory  
540 ARDS vs. controls; and D) All ARDS vs. controls.

541  
542 **Supplementary data 3:** A) 200 most upregulated genes in experimental models of lung injury  
543 compared to controls for 21 experimental systems in the Gene Expression Omnibus. B) Gene  
544 set enrichment analysis scores and leading edge genes for experimental model gene sets in TA  
545 differential expression for hyperinflammatory ARDS vs. controls. C) Gene set enrichment  
546 analysis scores and leading edge genes for experimental model gene sets in TA differential  
547 expression for hypoinflammatory ARDS vs. controls.

548  
549 **Supplementary data 4:** Differential gene expression for single-cell RNA sequencing for TA for  
550 the COMET cohort. A positive log<sub>2</sub> fold difference indicates the gene is more highly expressed in  
551 hyperinflammatory ARDS. A) Neutrophils, B) Monocytes, C) Monocyte-derived macrophages,  
552 D) Alveolar macrophages, E) T cells, F) Dendritic cells

553  
554 **Supplementary data 5:** IPA Upstream Regulator scores for pairwise comparisons of bulk RNA  
555 gene expression for TA in the COMET. A positive z-score indicates gene expression is  
556 consistent with higher activity of the upstream regulator in the hyperinflammatory ARDS



557 samples. A) Neutrophils, B) Monocytes, C) Monocyte-derived macrophages, D) T cells, and E)  
558 Dendritic cells

559

560 **Supplementary Data 6:** Connectome results for ligand-receptor pairs in TA single-cell RNA  
561 sequencing from the COMET cohort for A) hyperinflammatory ARDS and B) hypoinflammatory  
562 ARDS.

563

564 **Supplementary Data 7:** A) Z-scaled O-link protein concentrations for five hyperinflammatory  
565 ARDS, 20 hypoinflammatory ARDS, and 14 control subjects. B) Results of Wilcoxon rank-sum  
566 tests for pairwise comparisons of hyperinflammatory ARDS, hypoinflammatory ARDS, and  
567 control subjects.

568

569 **Supplementary figure 1:** Subjects included in this analysis.

570

571 **Supplementary figure 2:** Sensitivity analysis for differential gene expression between  
572 phenotypes after adjusting for fungal infections. (A) volcano plot of differential gene expression,  
573 where the  $\log_2$  fold difference is on the x-axis and the  $-\log_{10}$  adjusted p-value is on the y-axis.  
574 (B) Scatter plot showing estimated  $\log_2$ -fold difference in gene expression between phenotypes.  
575 The  $\log_2$ -fold difference in gene expression without adjusting for systemic fungal infections is on  
576 the x-axis, and the  $\log_2$ -fold difference in gene expression after adjusting is shown on the y-axis.  
577 (C-E) IPA upstream regulator z-scores for (C) cytokines, (D) transmembrane and nuclear  
578 receptors, and (E) transcription regulators in the IPA database. A maximum of 20 significant  
579 upstream regulators are shown for each panel. Redundant upstream regulators (e.g. interferons  
580 or interleukins in the same family) were omitted from the figure. For a complete list of upstream  
581 regulator scores, see Supplementary Data 2B.

582

583 **Supplementary figure 3:** Circos plots showing ligand-receptor pairs that are only significant in  
584 hyperinflammatory ARDS.

585

586 **Supplementary figure 4:** Heatmaps for plasma proteins that are significantly higher in A)  
587 Controls vs. hyperinflammatory ARDS and B) Controls vs. hypoinflammatory ARDS

588 **References**

- 589 1. Matthay, M. A. *et al.* Acute respiratory distress syndrome. *Nature Reviews Disease Primers*  
590 **5**, 1–22 (2019).
- 591 2. Abani, O. *et al.* Tocilizumab in patients admitted to hospital with COVID-19 (RECOVERY): a  
592 randomised, controlled, open-label, platform trial. *The Lancet* **397**, 1637–1645 (2021).
- 593 3. RECOVERY Collaborative Group. Dexamethasone in Hospitalized Patients with Covid-19.  
594 *New England Journal of Medicine* **384**, 693–704 (2021).
- 595 4. Beitler, J. R. *et al.* Advancing precision medicine for acute respiratory distress syndrome.  
596 *Lancet Respir Med* S2213-2600(21)00157–0 (2021) doi:10.1016/S2213-2600(21)00157-0.
- 597 5. Calfee, C. S. *et al.* Subphenotypes in acute respiratory distress syndrome: latent class  
598 analysis of data from two randomised controlled trials. *The Lancet Respiratory Medicine* **2**,  
599 611–620 (2014).
- 600 6. Famous, K. R. *et al.* Acute respiratory distress syndrome subphenotypes respond differently  
601 to randomized fluid management strategy. *American Journal of Respiratory and Critical*  
602 *Care Medicine* **195**, 331–338 (2017).
- 603 7. Calfee, C. S. *et al.* Acute respiratory distress syndrome subphenotypes and differential  
604 response to simvastatin: secondary analysis of a randomised controlled trial. *The Lancet*  
605 *Respiratory Medicine* **6**, 691–698 (2018).
- 606 8. Sinha, P. *et al.* Latent class analysis of ARDS subphenotypes: a secondary analysis of the  
607 statins for acutely injured lungs from sepsis (SAILS) study. *Intensive Care Medicine* **44**,  
608 1859–1869 (2018).

- 609 9. Sinha, P. *et al.* Latent class analysis-derived subphenotypes are generalisable to  
610 observational cohorts of acute respiratory distress syndrome: a prospective study. *Thorax*  
611 (2021) doi:10.1136/thoraxjnl-2021-217158.
- 612 10. Meyer, N. J., Gattinoni, L. & Calfee, C. S. Acute respiratory distress syndrome. *The Lancet*  
613 **398**, 622–637 (2021).
- 614 11. Maddali, M. V. *et al.* Validation and utility of ARDS subphenotypes identified by machine-  
615 learning models using clinical data: an observational, multicohort, retrospective analysis.  
616 *The Lancet Respiratory Medicine* (2022) doi:10.1016/S2213-2600(21)00461-6.
- 617 12. Sinha, P. *et al.* Latent Class Analysis Reveals COVID-19–related Acute Respiratory Distress  
618 Syndrome Subgroups with Differential Responses to Corticosteroids. *Am J Respir Crit Care*  
619 *Med* **204**, 1274–1285 (2021).
- 620 13. Chen, H. *et al.* Corticosteroid Therapy Is Associated With Improved Outcome in Critically Ill  
621 Patients With COVID-19 With Hyperinflammatory Phenotype. *Chest* **159**, 1793–1802 (2021).
- 622 14. Sinha, P. *et al.* Development and validation of parsimonious algorithms to classify acute  
623 respiratory distress syndrome phenotypes: a secondary analysis of randomised controlled  
624 trials. *Lancet Respir Med* **8**, 247–257 (2020).
- 625 15. Sinha, P., Churpek, M. M. & Calfee, C. S. Machine Learning Classifier Models Can Identify  
626 Acute Respiratory Distress Syndrome Phenotypes Using Readily Available Clinical Data. *Am J*  
627 *Respir Crit Care Med* **202**, 996–1004 (2020).
- 628 16. Sarma, A. *et al.* Tracheal aspirate RNA sequencing identifies distinct immunological features  
629 of COVID-19 ARDS. *Nat Commun* **12**, 5152 (2021).

- 630 17. Love, M. I., Huber, W. & Anders, S. Moderated estimation of fold change and dispersion for  
631 RNA-seq data with DESeq2. *Genome Biol* **15**, 550 (2014).
- 632 18. Zhu, A., Ibrahim, J. G. & Love, M. I. Heavy-tailed prior distributions for sequence count data:  
633 removing the noise and preserving large differences. *Bioinformatics* **35**, 2084–2092 (2019).
- 634 19. Krämer, A., Green, J., Pollard, J. & Tugendreich, S. Causal analysis approaches in Ingenuity  
635 Pathway Analysis. *Bioinformatics* **30**, 523–530 (2014).
- 636 20. Waldmann, T. A. The biology of interleukin-2 and interleukin-15: implications for cancer  
637 therapy and vaccine design. *Nat Rev Immunol* **6**, 595–601 (2006).
- 638 21. Wolf, L. *et al.* IL-17A-mediated expression of epithelial IL-17C promotes inflammation  
639 during acute *Pseudomonas aeruginosa* pneumonia. *American Journal of Physiology-Lung  
640 Cellular and Molecular Physiology* **311**, L1015–L1022 (2016).
- 641 22. Caulfield, A. J. & Lathem, W. W. Disruption of Fas-Fas Ligand Signaling, Apoptosis, and  
642 Innate Immunity by Bacterial Pathogens. *PLOS Pathogens* **10**, e1004252 (2014).
- 643 23. Deguine, J. & Barton, G. M. MyD88: a central player in innate immune signaling.  
644 *F1000Prime Rep* **6**, 97 (2014).
- 645 24. Oshiumi, H., Matsumoto, M., Funami, K., Akazawa, T. & Seya, T. TICAM-1, an adaptor  
646 molecule that participates in Toll-like receptor 3-mediated interferon-beta induction. *Nat  
647 Immunol* **4**, 161–167 (2003).
- 648 25. Sakai, J. *et al.* Lipopolysaccharide-induced NF- $\kappa$ B nuclear translocation is primarily  
649 dependent on MyD88, but TNF $\alpha$  expression requires TRIF and MyD88. *Sci Rep* **7**, 1428  
650 (2017).

- 651 26. Matute-Bello, G., Frevert, C. W. & Martin, T. R. Animal models of acute lung injury. *Am J*  
652 *Physiol Lung Cell Mol Physiol* **295**, L379–L399 (2008).
- 653 27. Gundersen, G. W. *et al.* GEO2Enrichr: browser extension and server app to extract gene sets  
654 from GEO and analyze them for biological functions. *Bioinformatics* **31**, 3060–3062 (2015).
- 655 28. Felciano, R. M. *et al.* Predictive systems biology approach to broad-spectrum, host-directed  
656 drug target discovery in infectious diseases. *Pac Symp Biocomput* 17–28 (2013).
- 657 29. Aran, D. *et al.* Reference-based analysis of lung single-cell sequencing reveals a transitional  
658 profibrotic macrophage. *Nat Immunol* **20**, 163–172 (2019).
- 659 30. Finak, G. *et al.* MAST: a flexible statistical framework for assessing transcriptional changes  
660 and characterizing heterogeneity in single-cell RNA sequencing data. *Genome Biology* **16**,  
661 278 (2015).
- 662 31. Zimmerman, K. D., Espeland, M. A. & Langefeld, C. D. A practical solution to  
663 pseudoreplication bias in single-cell studies. *Nat Commun* **12**, 738 (2021).
- 664 32. Williams, A. E. *et al.* Evidence for chemokine synergy during neutrophil migration in ARDS.  
665 *Thorax* **72**, 66–73 (2017).
- 666 33. Klimenkova, O. *et al.* A lack of secretory leukocyte protease inhibitor (SLPI) causes defects in  
667 granulocytic differentiation. *Blood* **123**, 1239–1249 (2014).
- 668 34. Iizuka, K. The transcription factor carbohydrate-response element-binding protein  
669 (ChREBP): A possible link between metabolic disease and cancer. *Biochimica et Biophysica*  
670 *Acta (BBA) - Molecular Basis of Disease* **1863**, 474–485 (2017).
- 671 35. Sadiku, P. *et al.* Neutrophils Fuel Effective Immune Responses through Gluconeogenesis and  
672 Glycogenesis. *Cell Metabolism* **33**, 411–423.e4 (2021).

- 673 36. Lawrence, T. & Natoli, G. Transcriptional regulation of macrophage polarization: enabling  
674 diversity with identity. *Nat Rev Immunol* **11**, 750–761 (2011).
- 675 37. Zhao, C., Gillette, D. D., Li, X., Zhang, Z. & Wen, H. Nuclear factor E2-related factor-2 (Nrf2)  
676 is required for NLRP3 and AIM2 inflammasome activation. *J Biol Chem* **289**, 17020–17029  
677 (2014).
- 678 38. Raredon, M. S. B. *et al.* *Connectome: computation and visualization of cell-cell signaling*  
679 *topologies in single-cell systems data*. 2021.01.21.427529  
680 <https://www.biorxiv.org/content/10.1101/2021.01.21.427529v1> (2021)  
681 doi:10.1101/2021.01.21.427529.
- 682 39. A draft network of ligand–receptor-mediated multicellular signalling in human | Nature  
683 Communications. <https://www.nature.com/articles/ncomms8866>.
- 684 40. Muzio, M. *et al.* FLICE, A Novel FADD-Homologous ICE/CED-3-like Protease, Is Recruited to  
685 the CD95 (Fas/APO-1) Death-Inducing Signaling Complex. *Cell* **85**, 817–827 (1996).
- 686 41. Tannenbaum, C. S. *et al.* The CXC chemokines IP-10 and Mig are necessary for IL-12-  
687 mediated regression of the mouse RENCA tumor. *J Immunol* **161**, 927–932 (1998).
- 688 42. Azzam, H. S. *et al.* CD5 Expression Is Developmentally Regulated By T Cell Receptor (TCR)  
689 Signals and TCR Avidity. *Journal of Experimental Medicine* **188**, 2301–2311 (1998).
- 690 43. Kalantar, K. L. *et al.* IDseq—An open source cloud-based pipeline and analysis service for  
691 metagenomic pathogen detection and monitoring. *GigaScience* **9**, giaa111 (2020).
- 692 44. Mick, E. *et al.* Upper airway gene expression reveals suppressed immune responses to  
693 SARS-CoV-2 compared with other respiratory viruses. *Nat Commun* **11**, 5854 (2020).

- 694 45. Paulson, J. N., Stine, O. C., Bravo, H. C. & Pop, M. Differential abundance analysis for  
695 microbial marker-gene surveys. *Nat Methods* **10**, 1200–1202 (2013).
- 696 46. Panzer, A. R. *et al.* Lung Microbiota Is Related to Smoking Status and to Development of  
697 Acute Respiratory Distress Syndrome in Critically Ill Trauma Patients. *Am J Respir Crit Care*  
698 *Med* **197**, 621–631 (2018).
- 699 47. Bos, L. D. *et al.* Identification and validation of distinct biological phenotypes in patients  
700 with acute respiratory distress syndrome by cluster analysis. *Thorax* **72**, 876–883 (2017).
- 701 48. Morrell, E. D. *et al.* Alveolar Macrophage Transcriptional Programs Are Associated with  
702 Outcomes in Acute Respiratory Distress Syndrome. *Am J Respir Crit Care Med* **200**, 732–741  
703 (2019).
- 704 49. Yao, C. *et al.* Cell-Type-Specific Immune Dysregulation in Severely Ill COVID-19 Patients. *Cell*  
705 *Reports* **34**, 108590 (2021).
- 706 50. Ashley, S. L. *et al.* Lung and gut microbiota are altered by hyperoxia and contribute to  
707 oxygen-induced lung injury in mice. *Sci Transl Med* **12**, (2020).
- 708 51. Heijnen, N. F. L. *et al.* Biological subphenotypes of acute respiratory distress syndrome may  
709 not reflect differences in alveolar inflammation. *Physiological Reports* **9**, e14693 (2021).
- 710 52. Britton, N. *et al.* Diversity of the lung mycobiome is associated with severity of disease in  
711 acute respiratory distress syndrome. *European Respiratory Journal* **56**, (2020).
- 712 53. Sulaiman, I. *et al.* Microbial signatures in the lower airways of mechanically ventilated  
713 COVID-19 patients associated with poor clinical outcome. *Nat Microbiol* **6**, 1245–1258  
714 (2021).

- 715 54. Dickson, R. P. *et al.* Enrichment of the lung microbiome with gut bacteria in sepsis and the  
716 acute respiratory distress syndrome. *Nat Microbiol* **1**, 16113 (2016).
- 717 55. Camilli, G., Griffiths, J. S., Ho, J., Richardson, J. P. & Naglik, J. R. Some like it hot: Candida  
718 activation of inflammasomes. *PLOS Pathogens* **16**, e1008975 (2020).
- 719 56. Sweeney, T. E., Lofgren, S., Khatri, P. & Rogers, A. J. Gene Expression Analysis to Assess the  
720 Relevance of Rodent Models to Human Lung Injury. *Am J Respir Cell Mol Biol* **57**, 184–192  
721 (2017).
- 722 57. Altemeier, W. A. *et al.* Modulation of Lipopolysaccharide-Induced Gene Transcription and  
723 Promotion of Lung Injury by Mechanical Ventilation. *The Journal of Immunology* **175**, 3369–  
724 3376 (2005).
- 725 58. Bernhard, W. *et al.* Conductive airway surfactant: surface-tension function, biochemical  
726 composition, and possible alveolar origin. *Am J Respir Cell Mol Biol* **17**, 41–50 (1997).
- 727 59. Kalantar, K. L. *et al.* Metagenomic comparison of tracheal aspirate and mini-bronchial  
728 alveolar lavage for assessment of respiratory microbiota. *American Journal of Physiology-  
729 Lung Cellular and Molecular Physiology* **316**, L578–L584 (2019).
- 730 60. Langelier, C. *et al.* Integrating host response and unbiased microbe detection for lower  
731 respiratory tract infection diagnosis in critically ill adults. *Proceedings of the National  
732 Academy of Sciences* **115**, E12353–E12362 (2018).
- 733 61. ARDS Definition Task Force. Acute respiratory distress syndrome: the Berlin definition.  
734 *JAMA* **307**, 2526–2533 (2012).



- 735 62. Horan, T. C., Andrus, M. & Dudeck, M. A. CDC/NHSN surveillance definition of health care–  
736 associated infection and criteria for specific types of infections in the acute care setting.  
737 *American Journal of Infection Control* **36**, 309–332 (2008).
- 738 63. Tsitsiklis, A. *et al.* Impaired immune signaling and changes in the lung microbiome precede  
739 secondary bacterial pneumonia in COVID-19. *Res Sq* (2021) doi:10.21203/rs.3.rs-380803/v1.
- 740 64. Chamberlain, S. A. & Szöcs, E. taxize: taxonomic search and retrieval in R. (2013)  
741 doi:10.12688/f1000research.2-191.v2.
- 742 65. McMurdie, P. J. & Holmes, S. phyloseq: an R package for reproducible interactive analysis  
743 and graphics of microbiome census data. *PLoS One* **8**, e61217 (2013).
- 744 66. Oksanen, J. *et al.* *vegan: Community Ecology Package*. (2020).
- 745

746 **Methods**

747 *Patient selection*

748 Subjects were selected from two prospective observational cohorts of critically ill  
749 patients. The first, the Acute Lung Injury in Critical Illness study, is a cohort of mechanically  
750 ventilated adults (age  $\geq 18$ ) admitted to the intensive care unit at the University of California,  
751 San Francisco Medical Center (UCSFMC) between from July 2013 until March 2020, when  
752 enrollment was paused due to the COVID-19 pandemic. The second, the COVID-19  
753 Multiphenotyping for Effective Therapies (COMET) study, is a multi-omic study of hospitalized  
754 patients with COVID-19 and hospitalized controls admitted to UCSFMC or Zuckerberg San  
755 Francisco General Hospital (ZSFGH).

756 These studies were approved by the UCSF Institutional Review Board (17-24056, 20-  
757 30497), which granted an initial waiver of informed consent to collect TA and blood samples  
758 within 48 hours of ICU admission. Informed consent was then obtained from patients or  
759 surrogates, as previously described<sup>60</sup>.

760 In this analysis, we included all available subjects in each cohort who were: 1) admitted  
761 to the intensive care unit for mechanical ventilation for ARDS or airway protection without  
762 radiographic evidence of underlying pulmonary disease and 2) for whom we had TA sequencing  
763 with at least 500,000 protein-coding counts. We reviewed PCA plots, hierarchical clustering, and  
764 percentage of non-zero reads per samples for quality control and excluded four samples as  
765 technical outliers. For our non-ARDS control patients, we excluded control subjects on  
766 immunosuppression, including corticosteroids, and those with immunocompromising conditions  
767 (HIV, chemotherapy, etc.).

768  
769 *ARDS adjudication and phenotype assignment*

770 Subject charts were reviewed for ARDS adjudication by at least two study authors (AS,  
771 PS, ES, FM, CL, ZL, KK, CH, MM, CC) blinded to all biological data. ARDS was diagnosed  
772 using the Berlin Definition<sup>61</sup>. Lower respiratory tract infections were diagnosed using the CDC  
773 surveillance definition<sup>62</sup>. ARDS phenotype was determined using a three-variable classifier  
774 model (IL-8, protein C, and bicarbonate) previously developed and validated for this purpose<sup>14</sup>.  
775 This classifier model assigns subjects a probability of assignment to the hyperinflammatory  
776 molecular phenotype identified using latent class analyses. Subjects with a probability of class  
777 assignment greater than 0.5 were assigned to the hyperinflammatory class. Plasma biomarkers  
778 were not available for five subjects with TA bulk RNA sequencing. For these subjects, we used  
779 a validated clinical classifier model to assign phenotype.<sup>11,15</sup>

780  
781 *RNA sequencing*

782 Following enrollment, TA was collected and stored in RNase free conditions as  
783 previously described<sup>60</sup>. Metagenomic next generation sequencing (mNGS) of RNA was  
784 performed on TA specimens using an established sequencing pipeline. Following RNA  
785 extraction (Zymo Pathogen Magbead Kit) and DNase treatment, human cytosolic and  
786 mitochondrial ribosomal RNA was depleted using FastSelect (Qiagen). To control for  
787 background contamination, we included negative controls (water and HeLa cell RNA) as well as  
788 positive controls (spike-in RNA standards from the External RNA Controls Consortium (ERCC)).  
789 RNA was then fragmented and underwent library preparation using the NEBNext Ultra II  
790 RNASeq Kit (New England Biolabs). Libraries underwent 146 nucleotide paired-end Illumina  
791 sequencing on an Illumina Novaseq 6000 instrument.

792

793 *Host differential expression and pathway analysis*

794 Following demultiplexing, sequencing reads were pseudo-aligned with *kallisto* (v. 0.46.1;  
795 including bias correction) to an index consisting of all transcripts associated with human protein  
796 coding genes (ENSEMBL v. 99), cytosolic and mitochondrial ribosomal RNA sequences, and  
797 the sequences of ERCC RNA standards. Gene-level counts were generated from the transcript-  
798 level abundance estimates using the R package *tximport*, with the scaledTPM method. Samples  
799 retained in the dataset had a total of at least 500,000 estimated counts associated with  
800 transcripts of protein coding genes, and the median across all samples was 7,528,890 counts.

801 We used an established bioinformatics pipeline to compare differential gene expression  
802 in TA from hyperinflammatory and hypoinflammatory ARDS. Differential expression analysis  
803 was performed using DESeq2. Gene expression was fit to a model using the design formula  
804 ~Sequencing Batch + Gender + Z-scaled Age + Diagnosis. We performed pairwise comparisons  
805 of 1) hyperinflammatory ARDS to hypoinflammatory ARDS, 2) all ARDS subjects to  
806 mechanically ventilated controls, 3) hyperinflammatory ARDS to controls, and 4)  
807 hypoinflammatory ARDS to controls. Empirical Bayesian shrinkage estimators for log<sub>2</sub>-fold  
808 change were fit using *apecglm*. Differentially expressed genes with an independent-hypothesis  
809 weighted FDR < 0.1 and absolute shrunken log<sub>2</sub>FoldChange greater than 0.5.

810 Differentially expressed genes were analyzed using Ingenuity Pathway Analysis (IPA,  
811 Qiagen). We ran IPA Core Analyses for each pairwise comparison of differential gene  
812 expression. IPA compares differentially expressed genes to a database of gene signatures  
813 derived from experimental datasets. In addition to identifying signatures of canonical pathways  
814 and cellular function, IPA includes a database of upstream regulators of gene function. These  
815 include endogenous signaling molecules, such as cytokines, and exogenous stimuli, such as  
816 drugs or toxins. The dataset also includes annotations of the relationship between regulators,  
817 which can be used to construct mechanistic networks of regulators that may indirectly affect  
818 gene expression. For each of the signatures, IPA calculates a p-value for the overlap of DE  
819 genes with genes in the signature (using Fisher's exact test) and a z-score that tests whether  
820 the measured direction of gene expression is consistent the direction in a gene signature. We  
821 defined significant pathways, regulators, and networks as those with a Benjamini-Hochberg  
822 false detection rate less than 0.1 or an absolute z-score greater than 2.

823  
824 *Single-cell RNA sequencing*

825 TA were collected and stored at room temperature (to preserve neutrophils) and  
826 processed within three hours as previously described<sup>63</sup>. Briefly, TA cells were isolated and  
827 selected for expression of CD45, prepared with a V(D)J v1.1 kit according to the manufacturer's  
828 protocol, processed on a 10x Genomics Chip A without multiplexing, and sequenced on an  
829 Illumina NovaSeq 6000 platform. Because samples had to be processed shortly after collection,  
830 batch processing and multiplexing were not feasible. Transcripts were aligned in Cell Ranger  
831 and filtered count matrices were imported into a Seurat object. Cells were filtered to have at  
832 least 300 counts, no more than 30,000 counts, and less than 10% mitochondrial genes. Cell  
833 types were determined using SingleR, and the Human Primary Cell Atlas was used as the  
834 annotation reference. Patients were assigned phenotypes on the basis of plasma IL-8, protein  
835 C, and bicarbonate concentrations. Differential gene expression for each cell type was  
836 determined using *MAST*, using a mixed effects model with fixed effects for phenotype and  
837 cellular detection rate and a random effect for subject. Differentially expressed genes were  
838 identified using Benjamini-Hochberg FDR < 0.1.

839  
840 *Plasma proteomic analysis*

841 Plasma samples were analyzed using the O-link Proteomics Assay. This assay  
842 generates a semi-quantitative measure of plasma protein concentrations for 96 plasma  
843 biomarkers. We excluded all samples that were flagged with a QC warning from the O-link

844 platform, and excluded any biomarker where protein concentrations could not be measured for  
845 at least 90% of samples. Measurements for 73 of the biomarkers on the panel passed the  
846 manufacturer's quality control filter and were included for analysis. Normalized protein  
847 expression measurements were compared using a Wilcoxon rank-sum test and p-values were  
848 adjusted using the Benajmini-Hochberg method (FDR < 0.1).  
849

#### 850 *Comparison of differentially expressed genes to experimental models of acute lung injury*

851 We selected experimental models of acute lung injury in the Gene Expression Omnibus  
852 from a list of previously identified rodent and human models<sup>56</sup>. Lists of all genes differentially  
853 expressed at a Benjamini-Hochberg corrected p-value less than 0.05 were downloaded using  
854 GEO2Enrich<sup>27</sup>. We then used the genes that were upregulated in the experimental lung injury  
855 model as gene signatures in GSVA. If more than 200 genes were differentially expressed in the  
856 experimental model, we used the top 200 genes (by p-value) for the experimental gene  
857 signature. A complete list of GEO accession numbers, experimental models, and genes used in  
858 each signature can be found in Supplemental Table 3A. We used limma to compare GSVA  
859 scores in samples from each phenotype to GSVA scores in controls.  
860

#### 861 *Metagenomic sequencing*

862 FASTQ files were analyzed using IDSeq<sup>43</sup> to identify microbial reads in TA  
863 transcriptomes. Count matrices were downloaded for tracheal samples and water controls for  
864 analysis in RStudio. Taxonomic data were downloaded from NCBI using taxize<sup>64</sup>, and the matrix  
865 was filtered to only include viruses, bacteria, and fungi. We fit a negative binomial model of  
866 taxon-specific transcript counts against the total number of ERCC spike-in transcript reads in  
867 each of the water control samples. We then used this model to predict the background  
868 contamination of each taxon in each TA sample based on the number of ERCC reads. We then  
869 subtracted the predicted contamination from the measured reads in the sample to estimate the  
870 abundance in TA and rounded the estimate to the nearest integer. If the taxon-specific reads in  
871 a TA sample were not significantly different from predicted background contamination after  
872 adjusting for multiple comparisons using the Benjamini-Hochberg method, we estimated the  
873 abundance as zero. This background-corrected count matrix was used to construct a phyloseq<sup>65</sup>  
874 object. Taxa were agglomerated at the genus level for downstream analysis.

875 We used estimate\_richness to calculate the Shannon diversity index for all microbial  
876 taxa, as well as subgroup analyses of bacterial and fungal genera, in TA samples. We then  
877 used vegan<sup>66</sup> to estimate the Bray-Curtis dissimilarity between samples and used adonis2 to  
878 calculate PERMANOVA p-values. We then used metagenomeSeq<sup>45</sup> to estimate differential  
879 abundance between phenotypes using zero-inflated log-normal mixture models for each genus.  
880 Normalization factors were calculated using Wrench normalization and differential abundance  
881 was estimated using fitFeatureModel.  
882

**(A.i)** Hyperinflammatory vs. Hypoinflammatory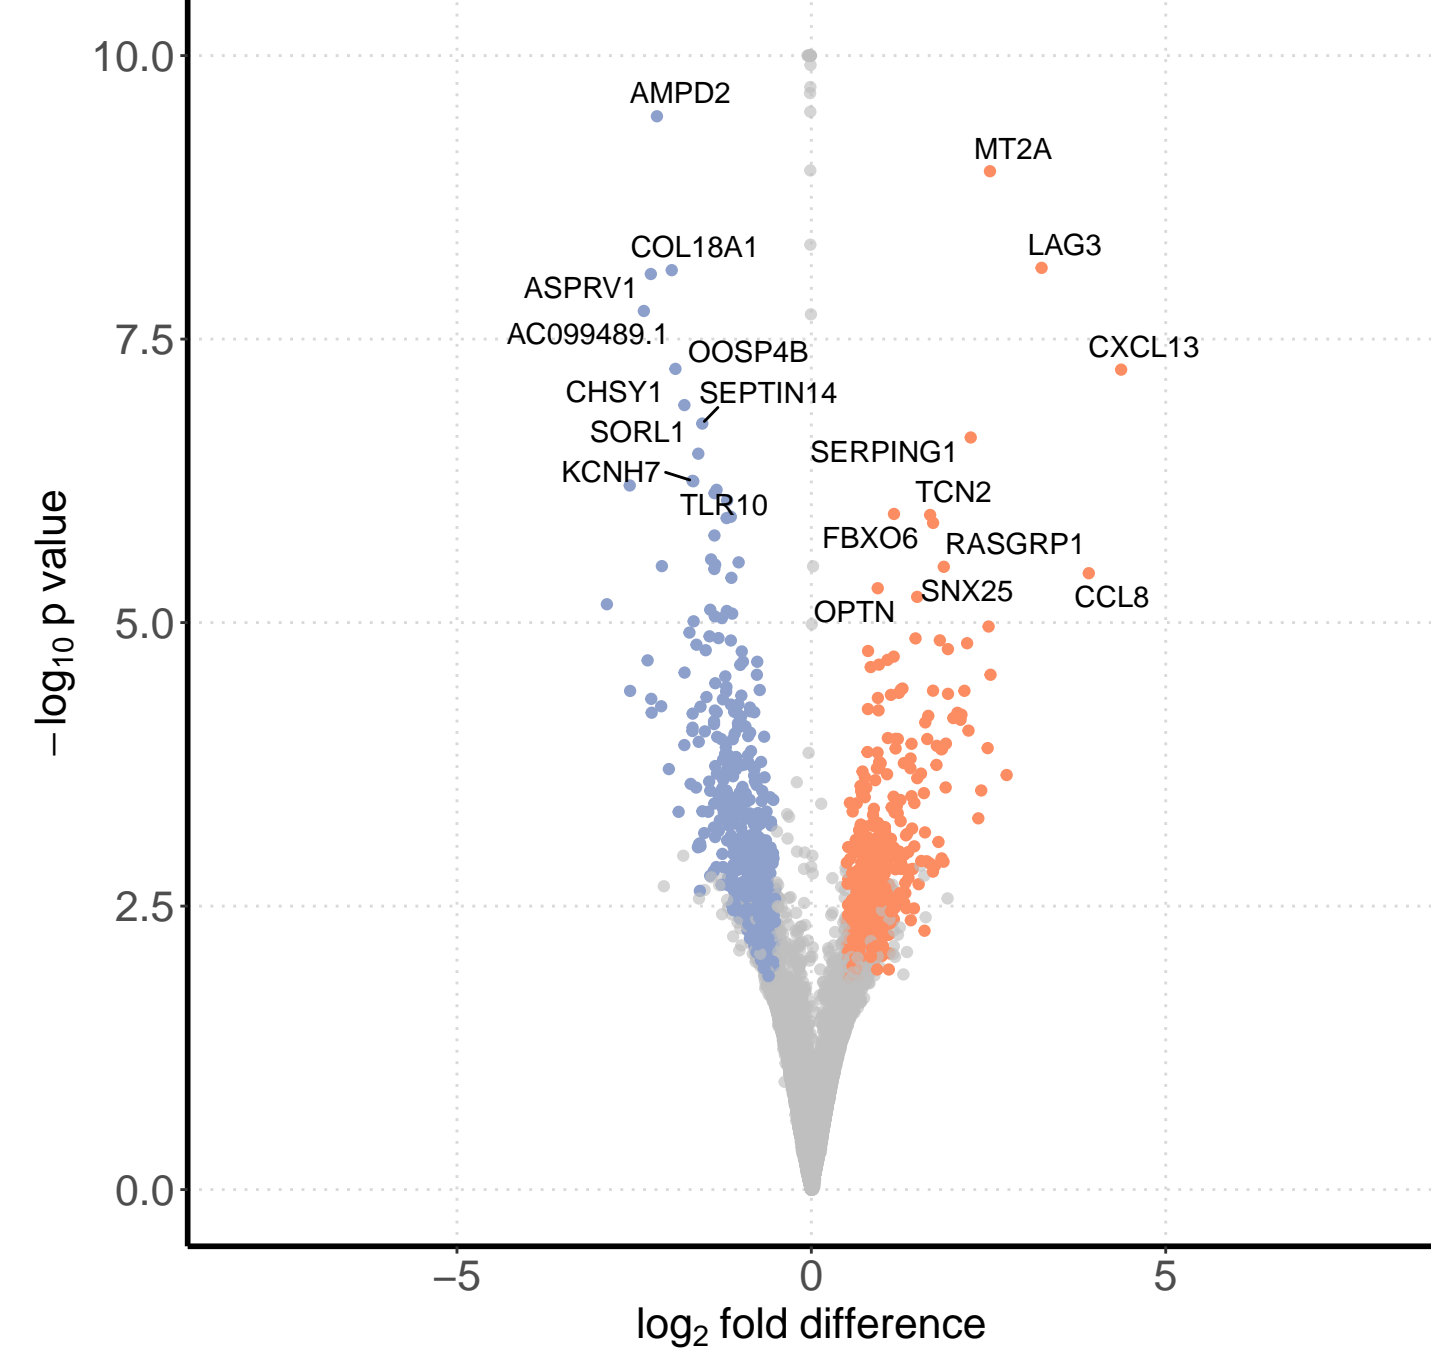**(A.ii)**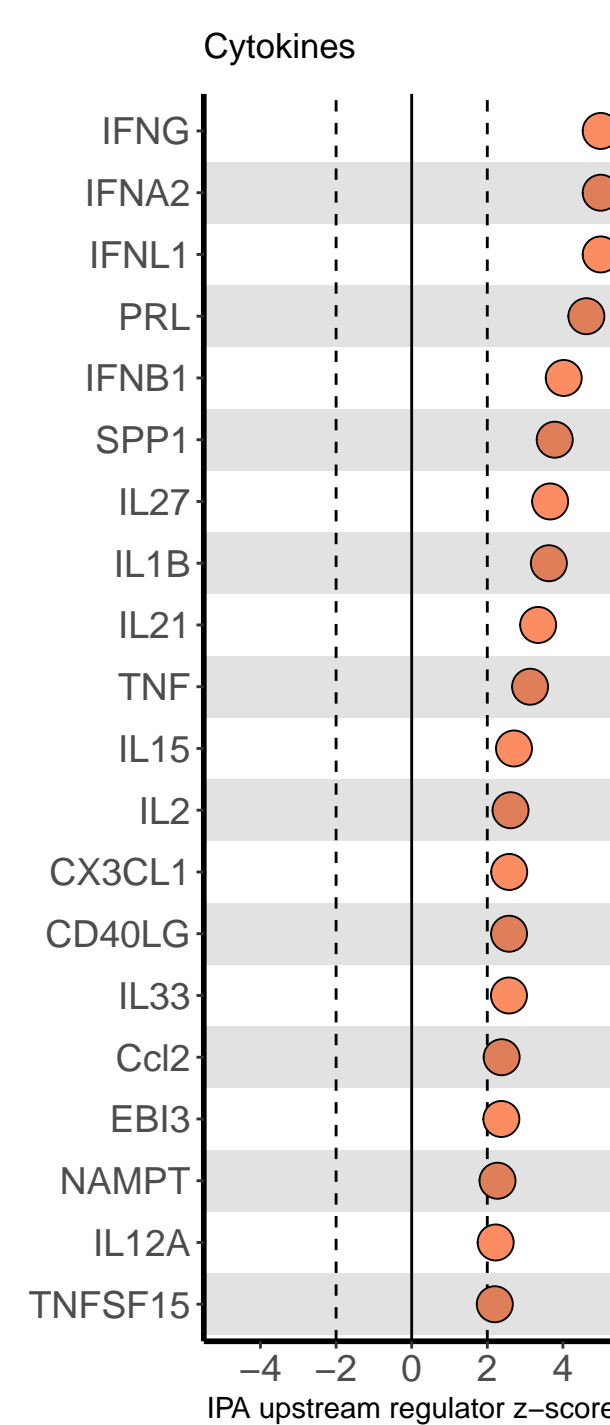**(A.iii)**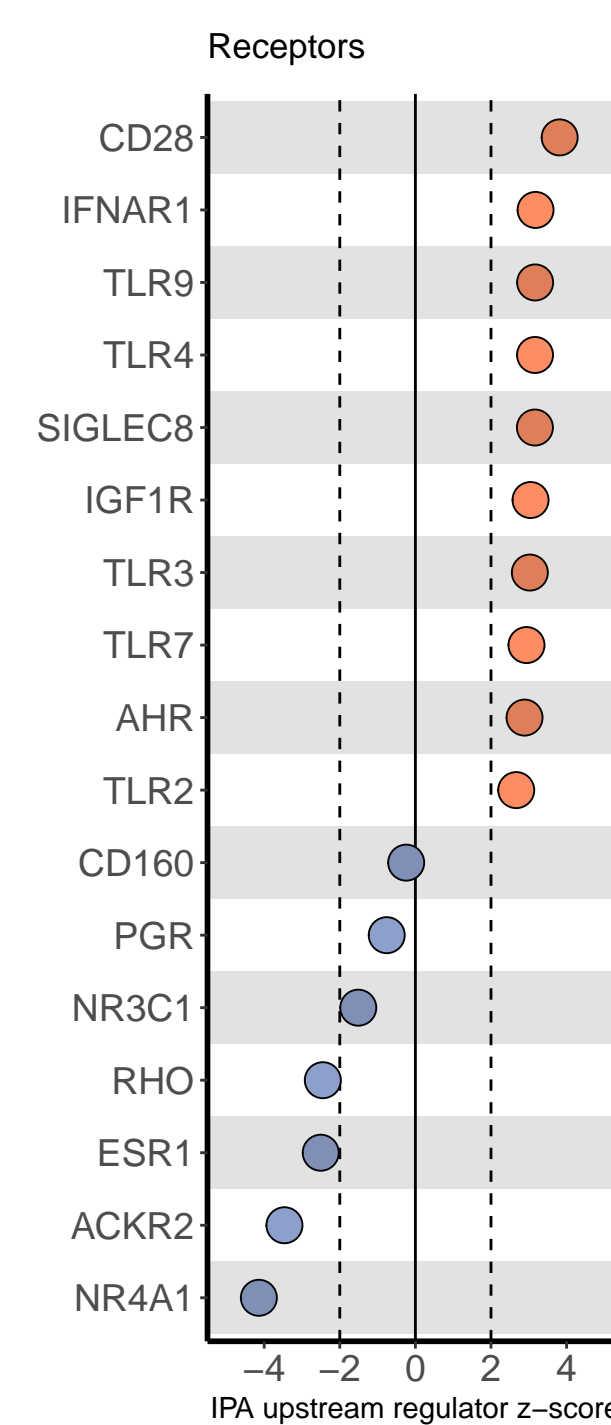**(A.iv)**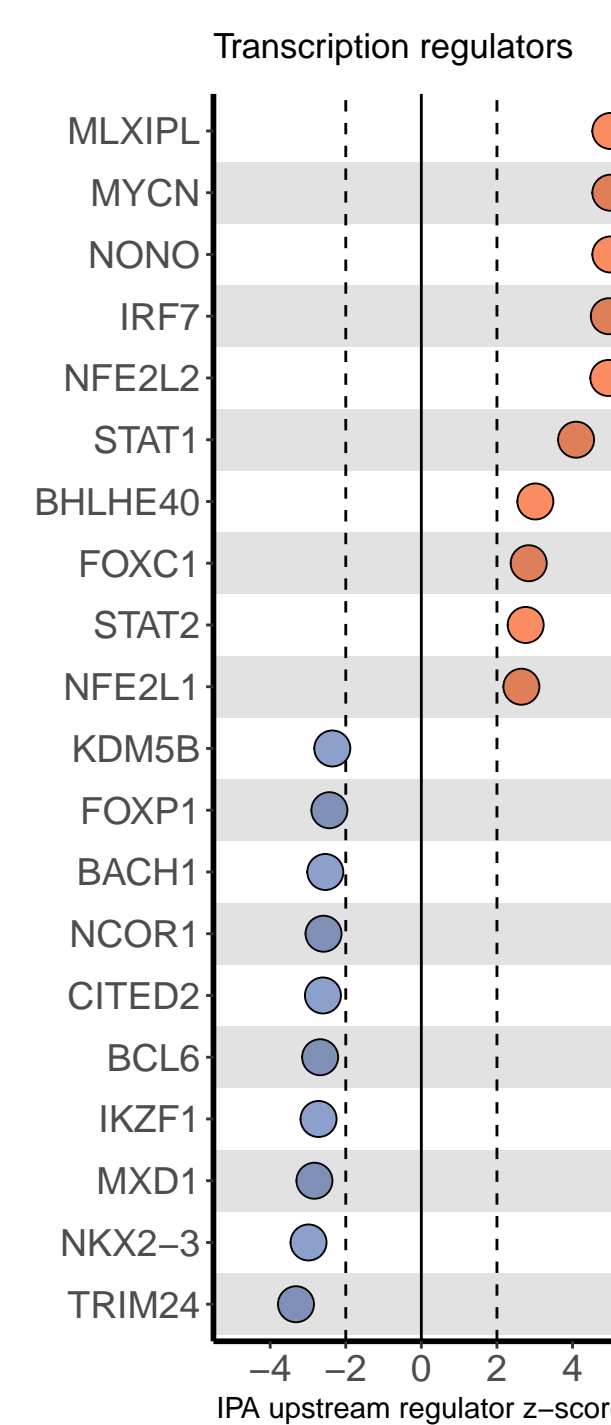**(B.i)**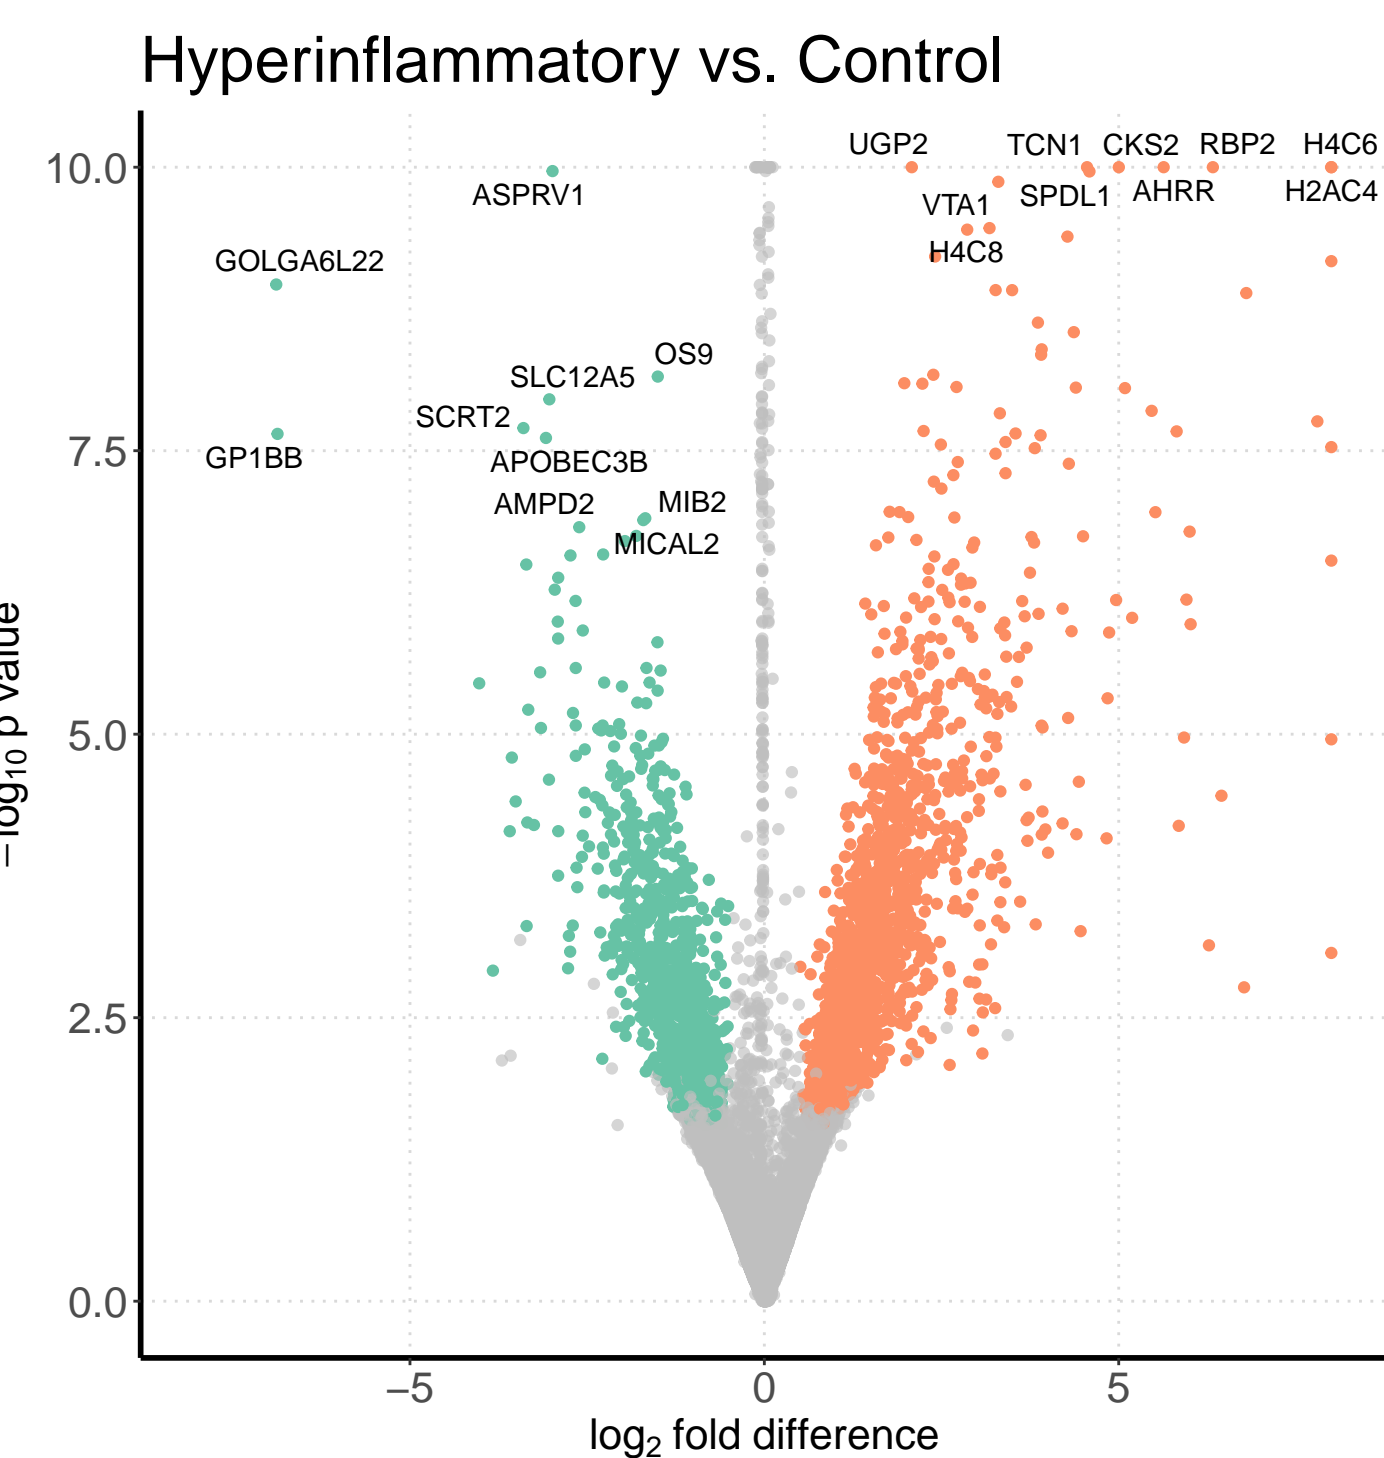**(B.ii)**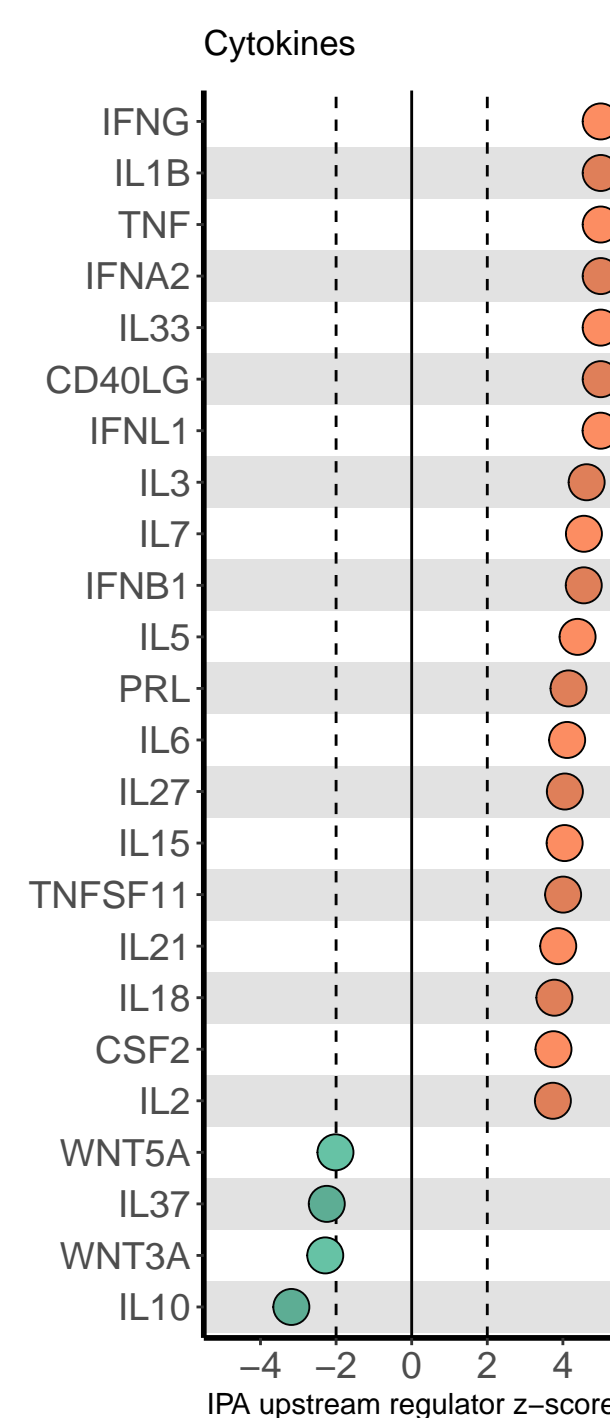**(B.iii)**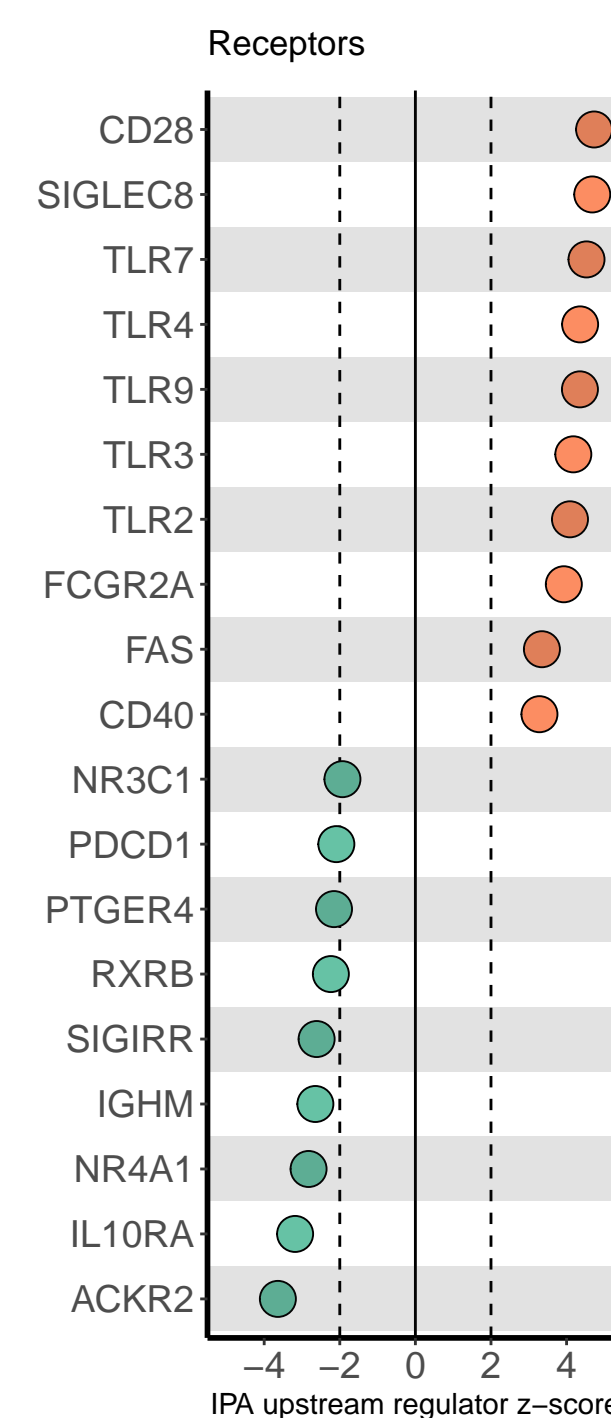**(B.iv)**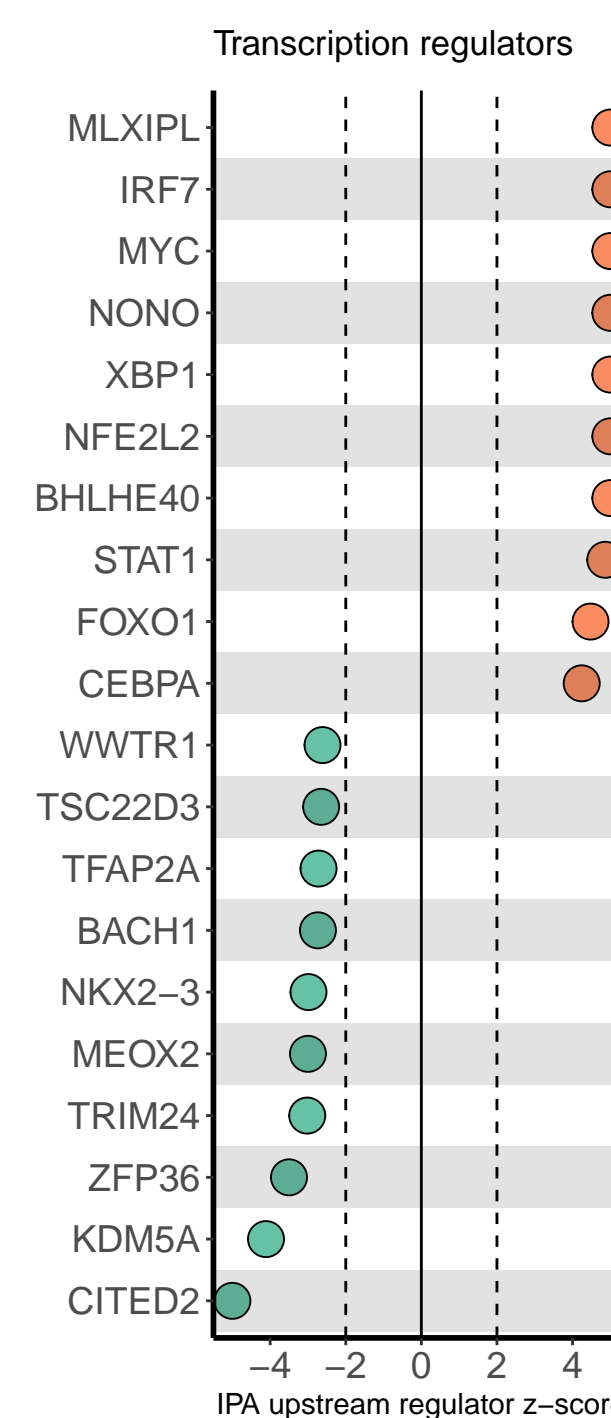**(C.i)**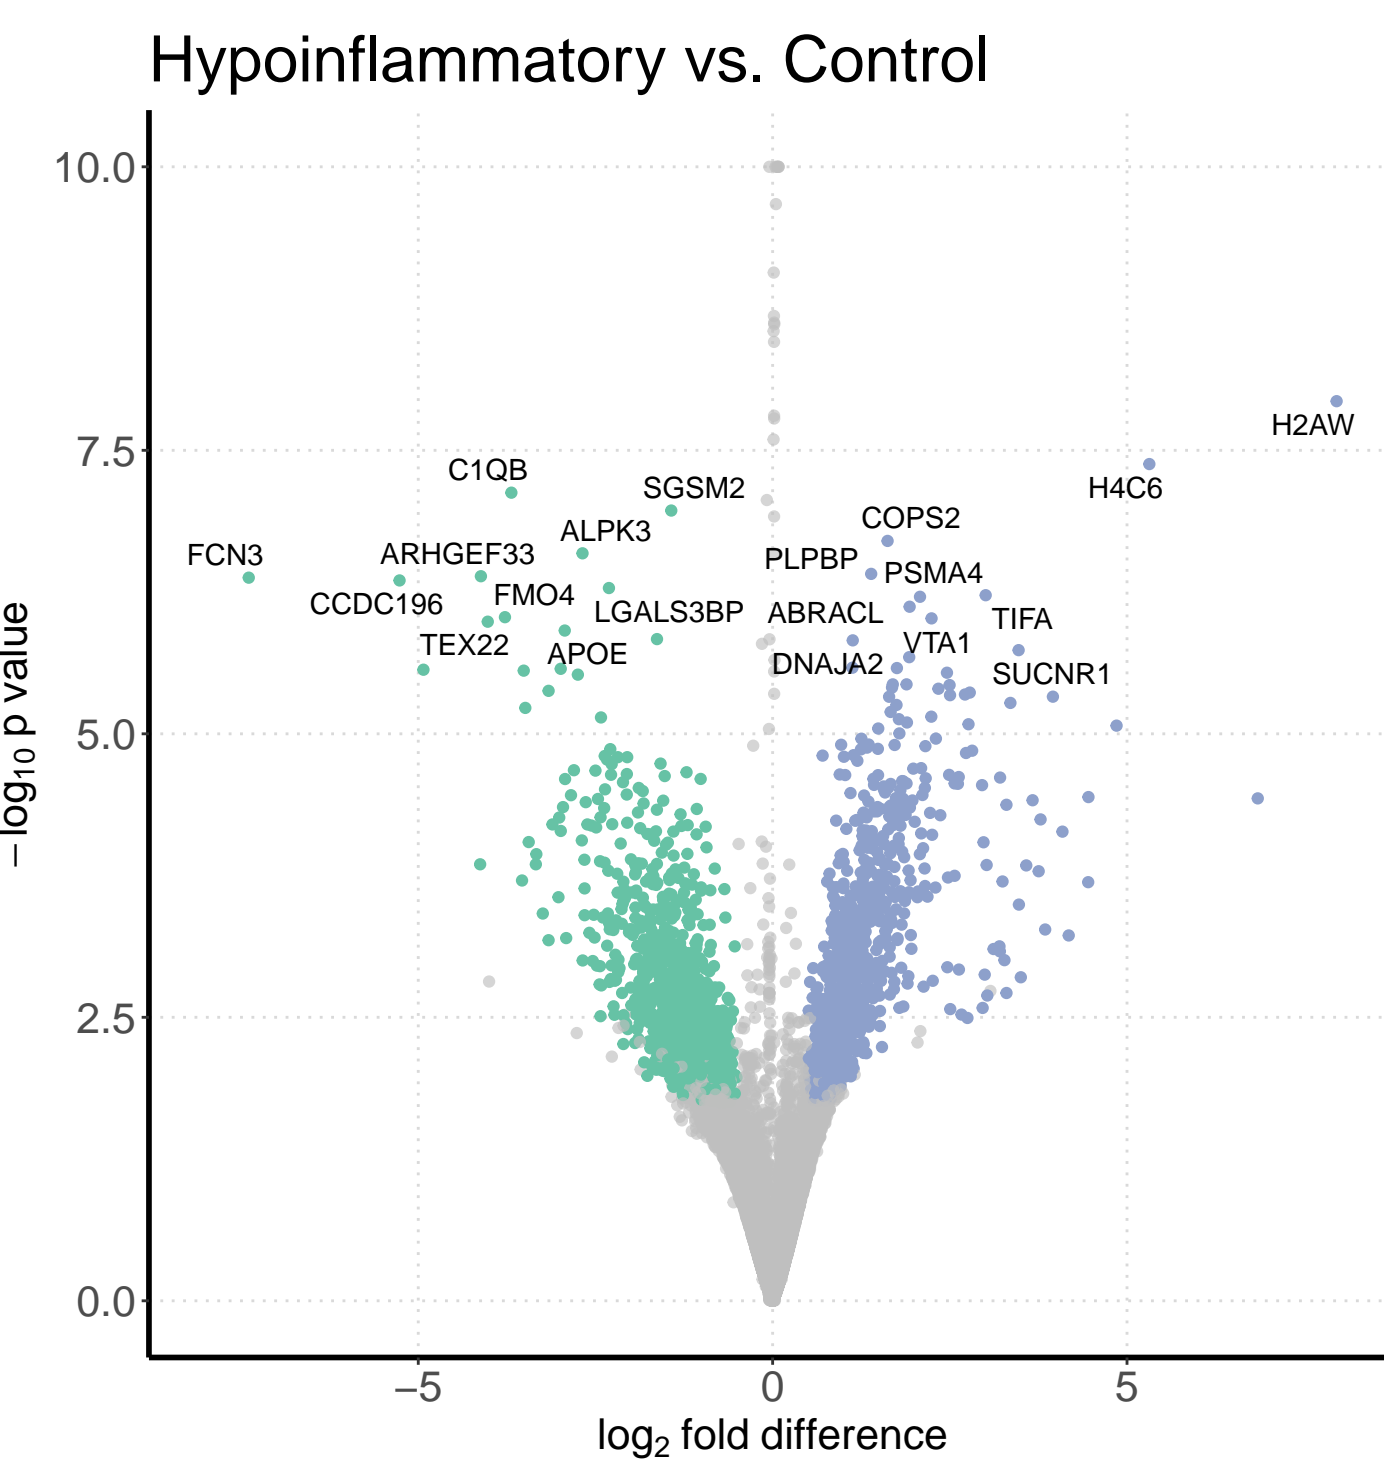**(C.ii)**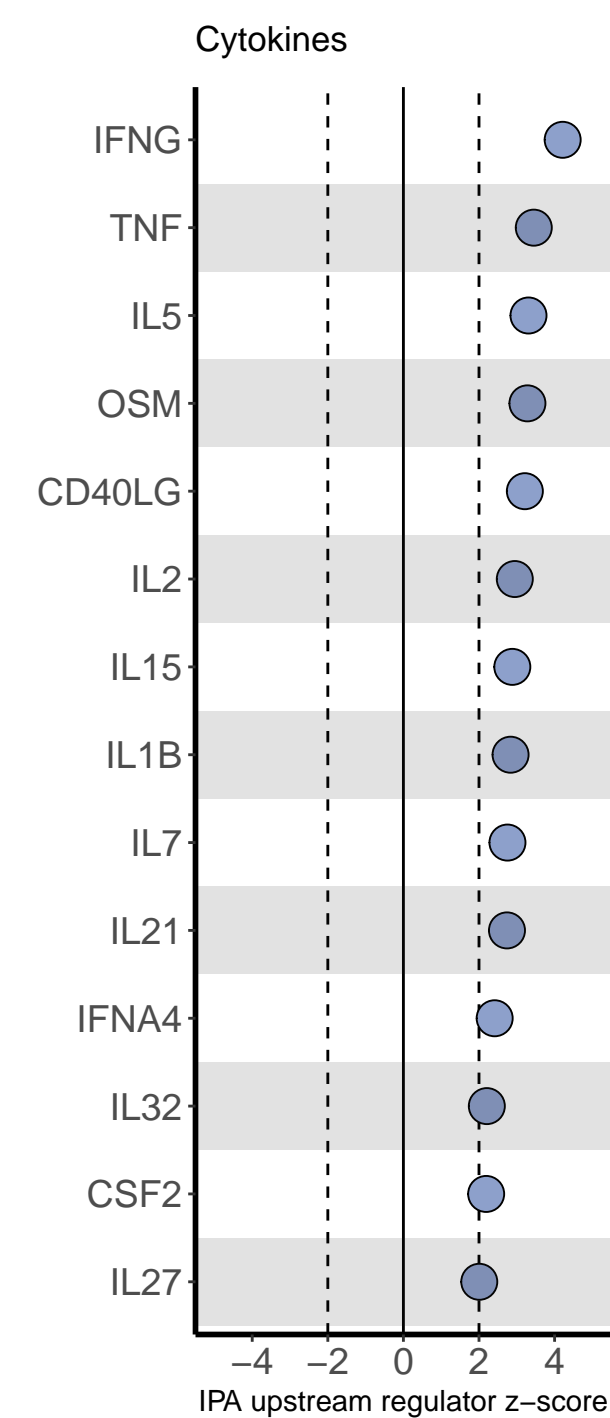**(C.iii)**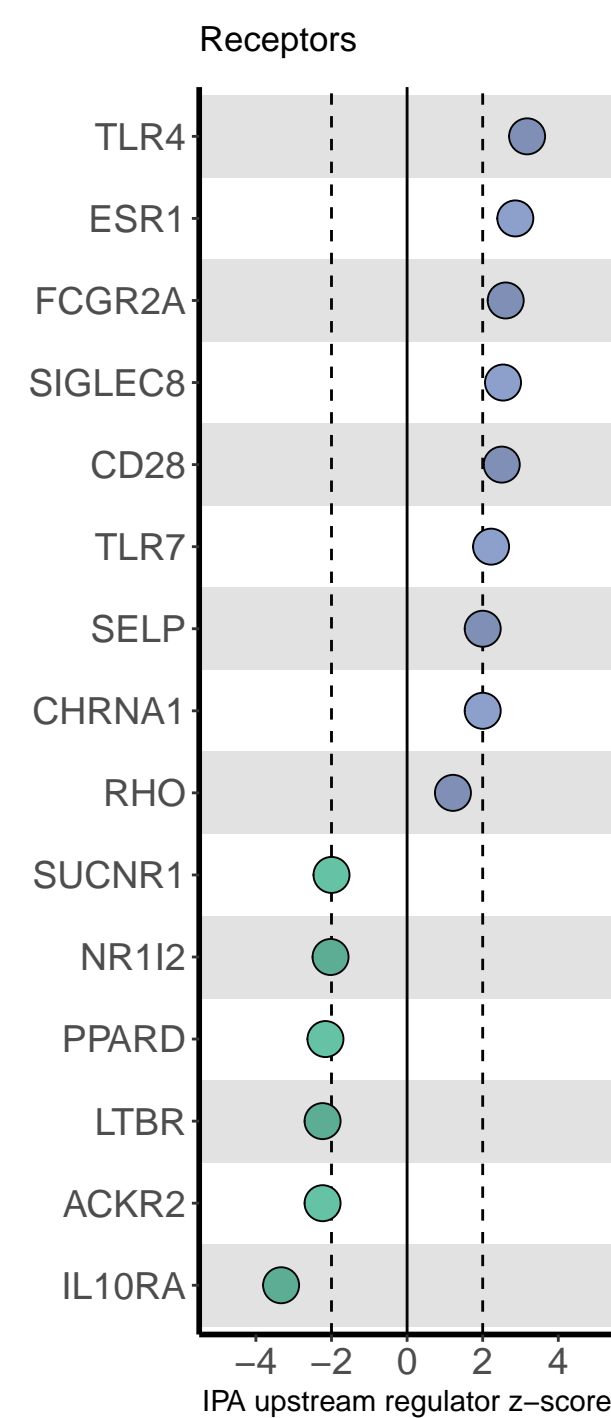**(C.iv)**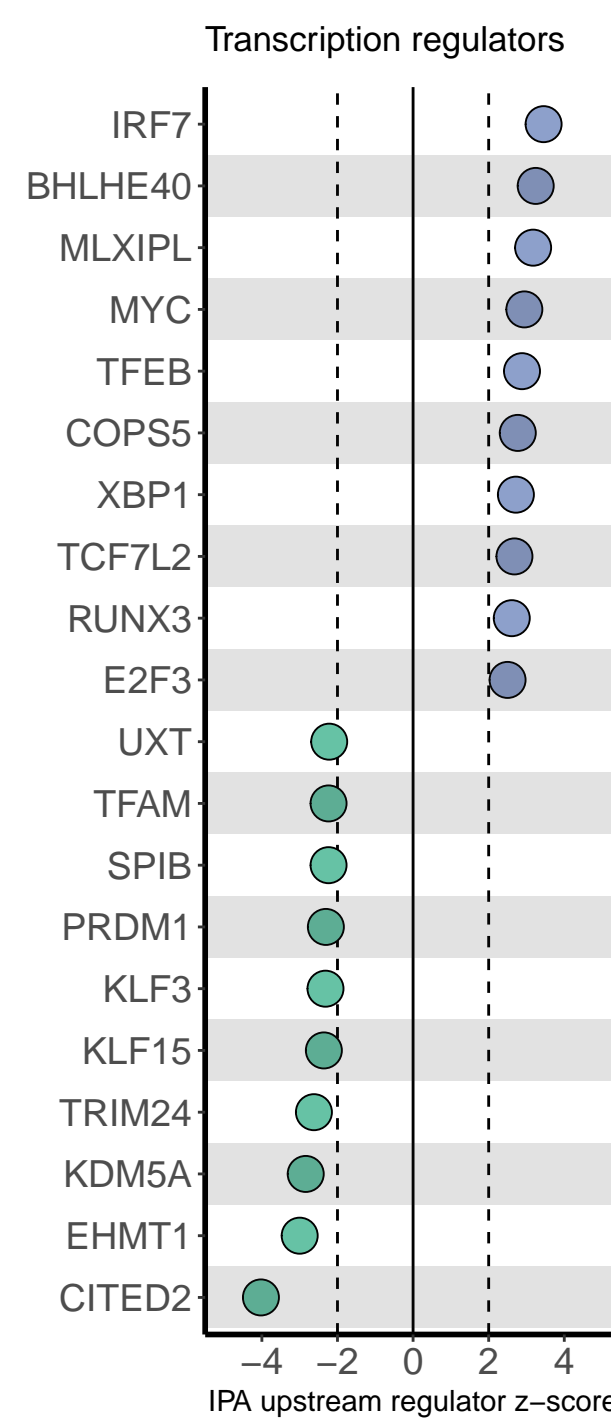

Phenotype  
 ● Control  
 ● HypoARDS  
 ● HyperARDS

**(D)**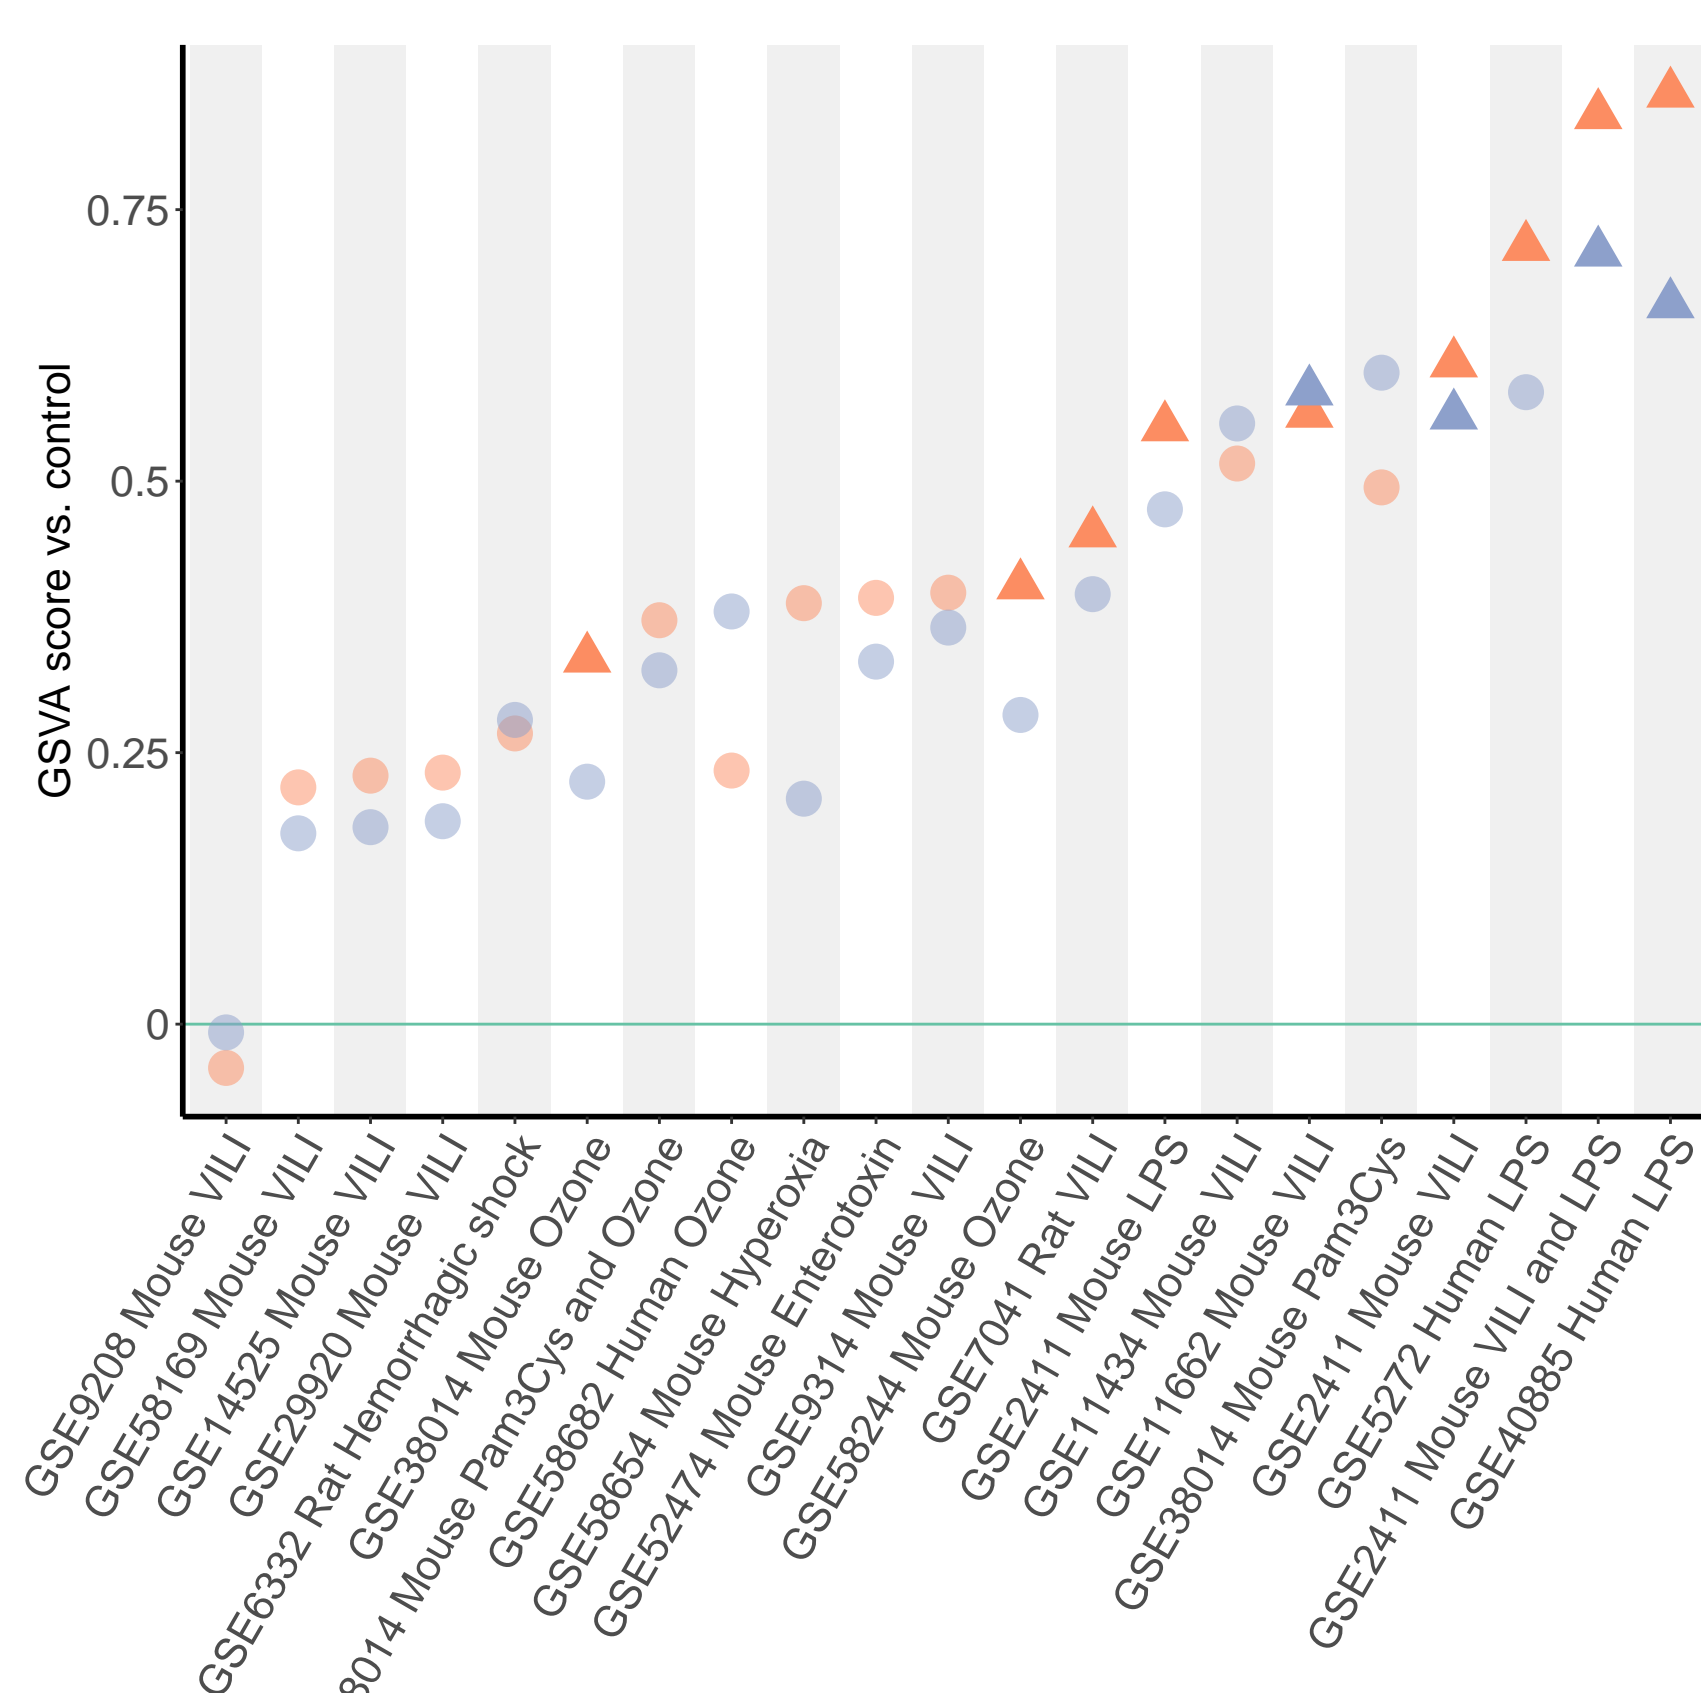**(E.i)**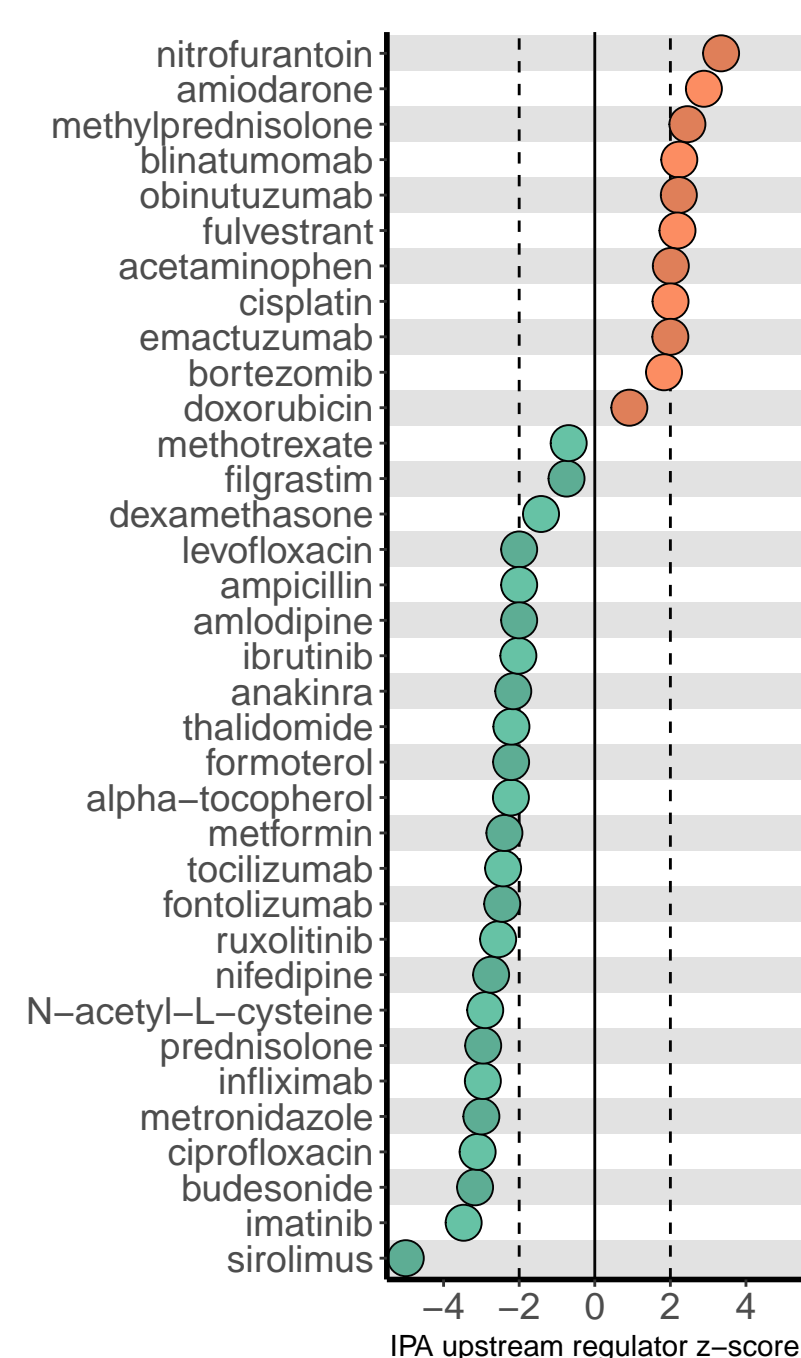**(E.ii)**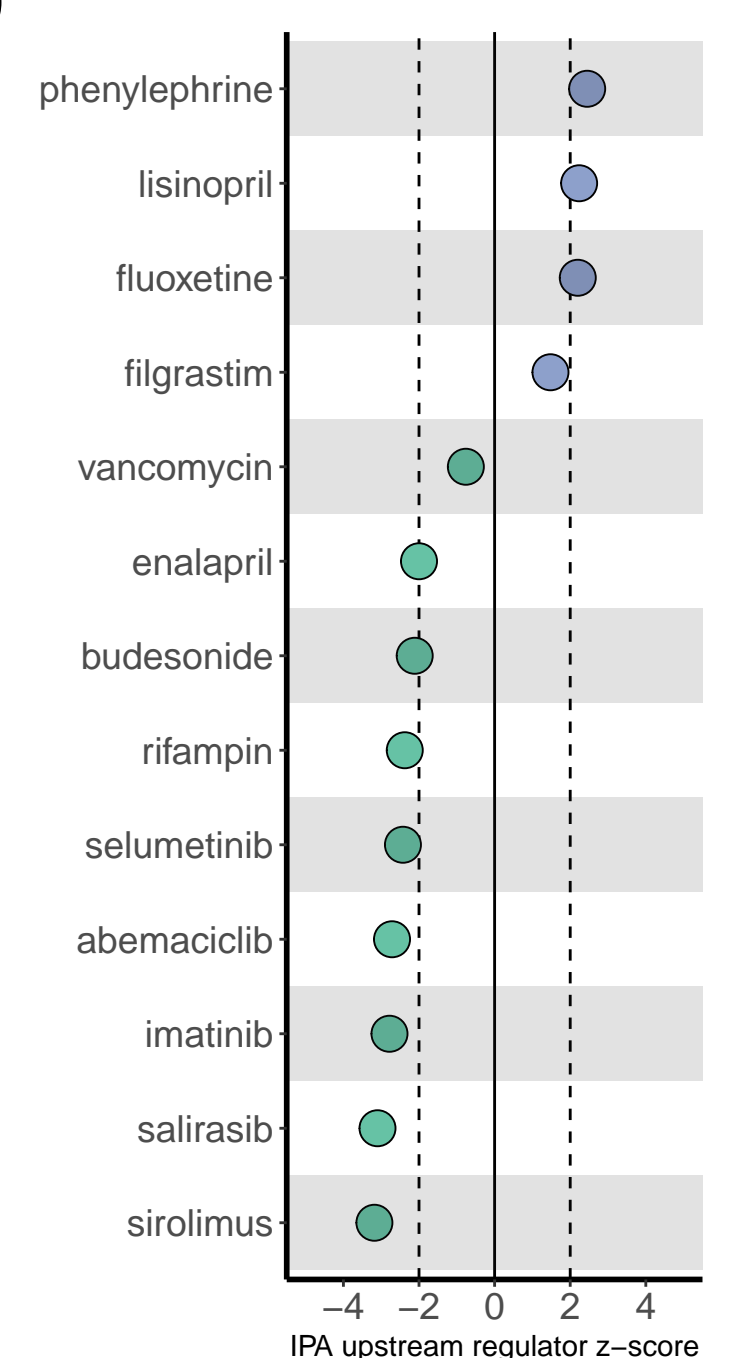



**A**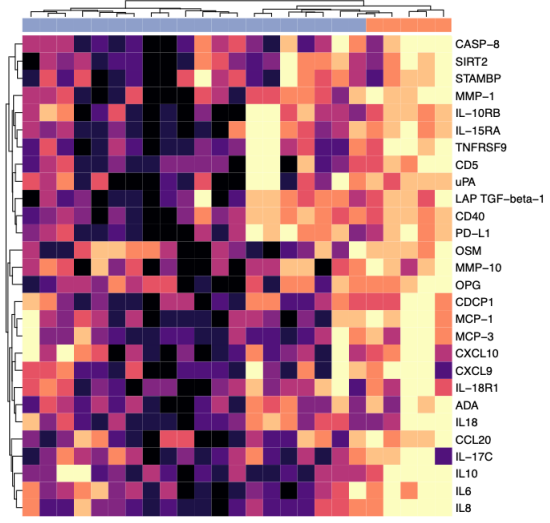**B**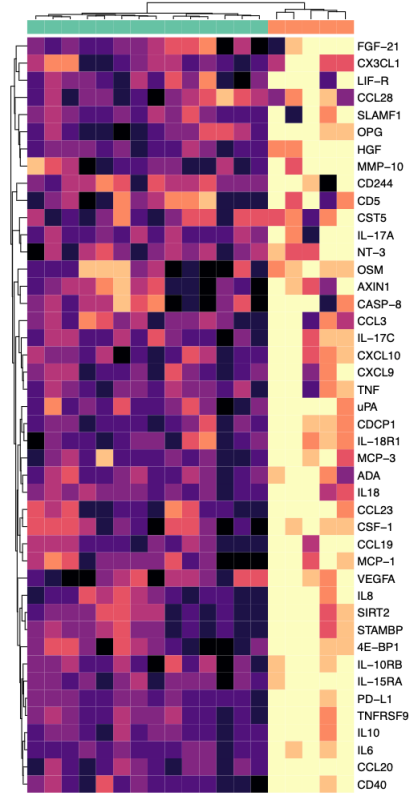**C**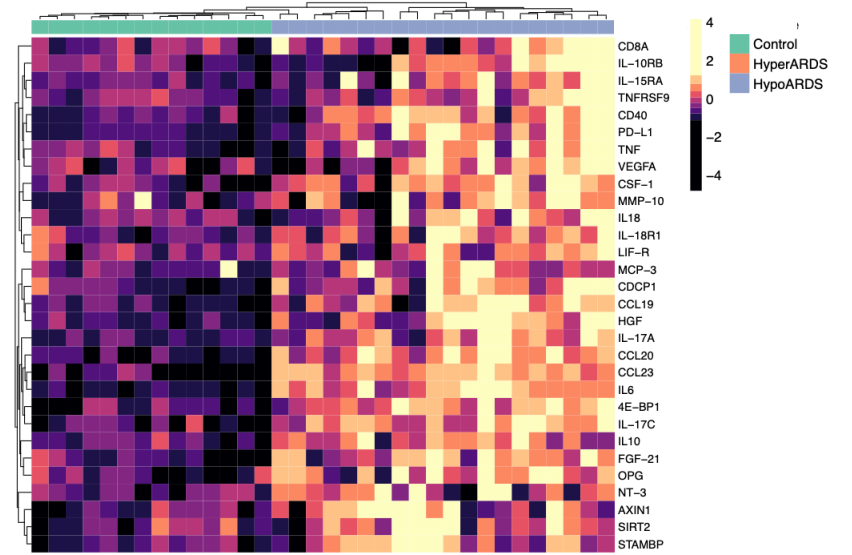

**(A)**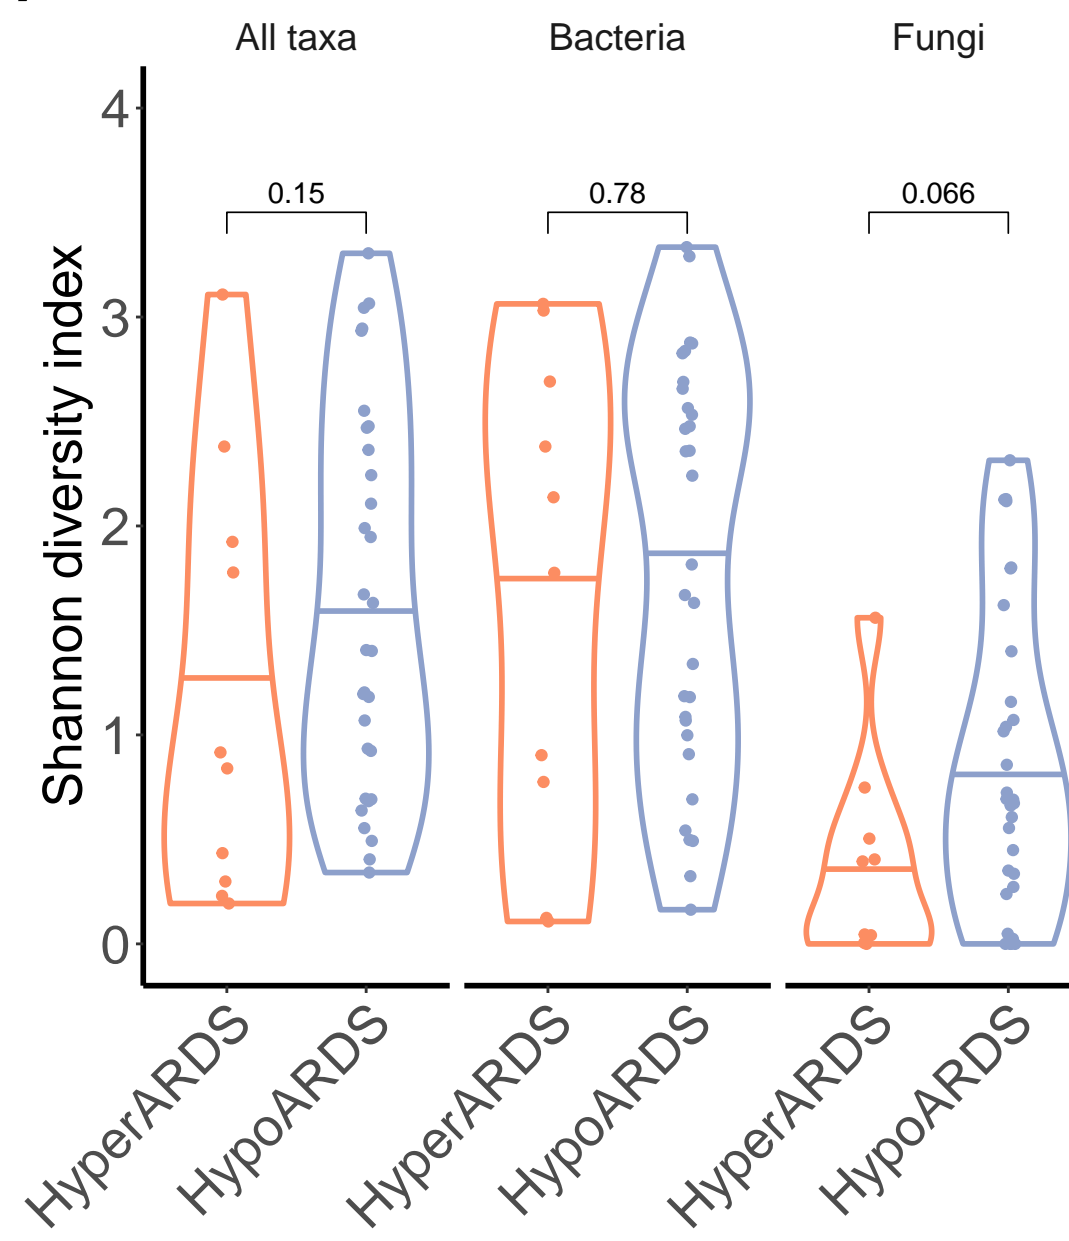**(B)**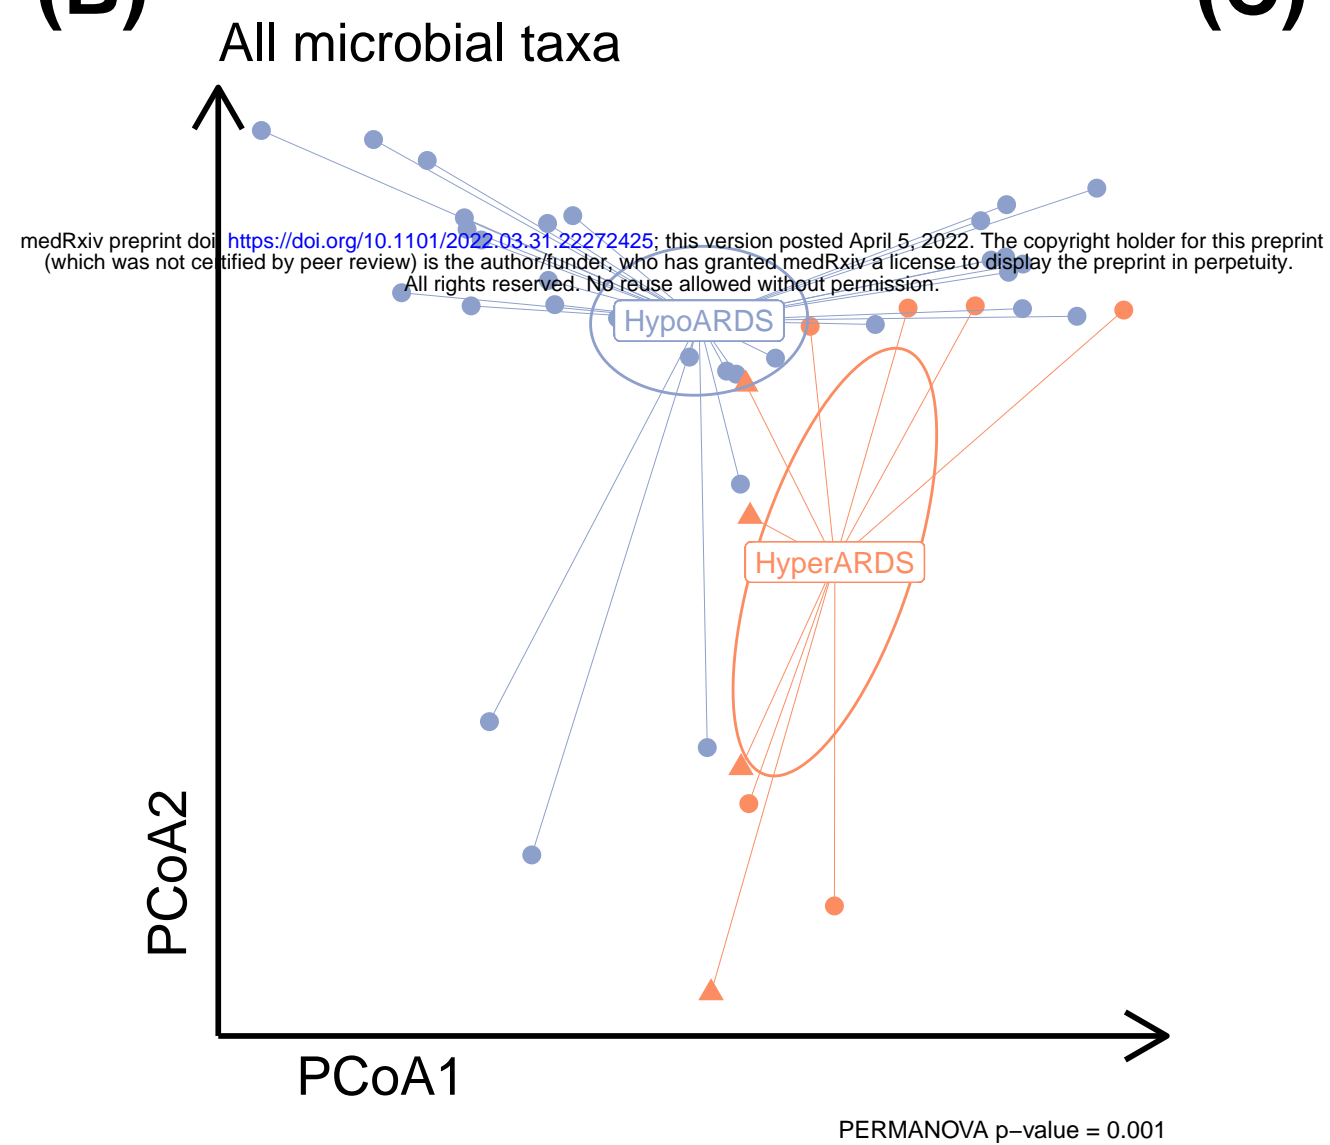**(C)**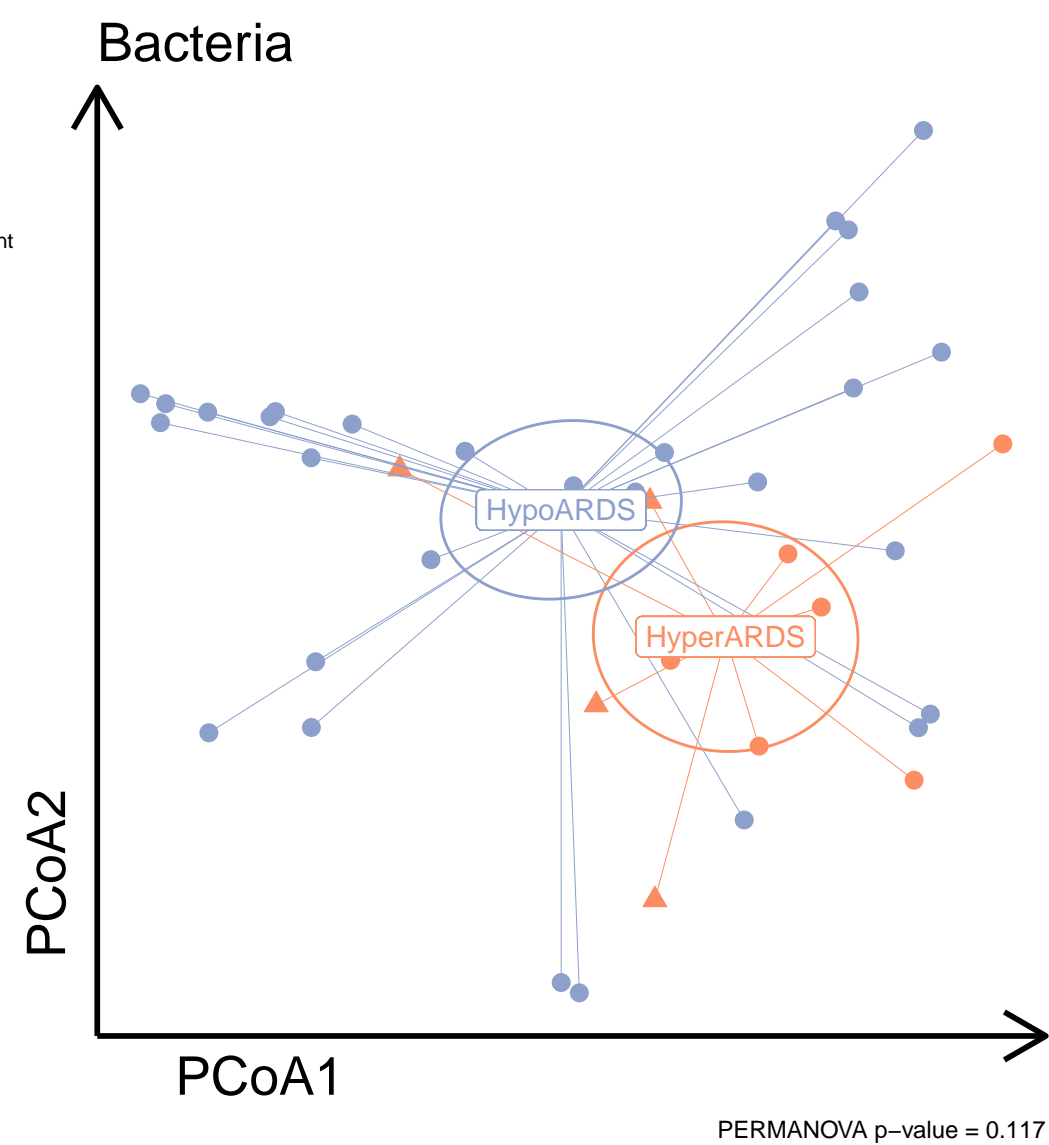**(D)**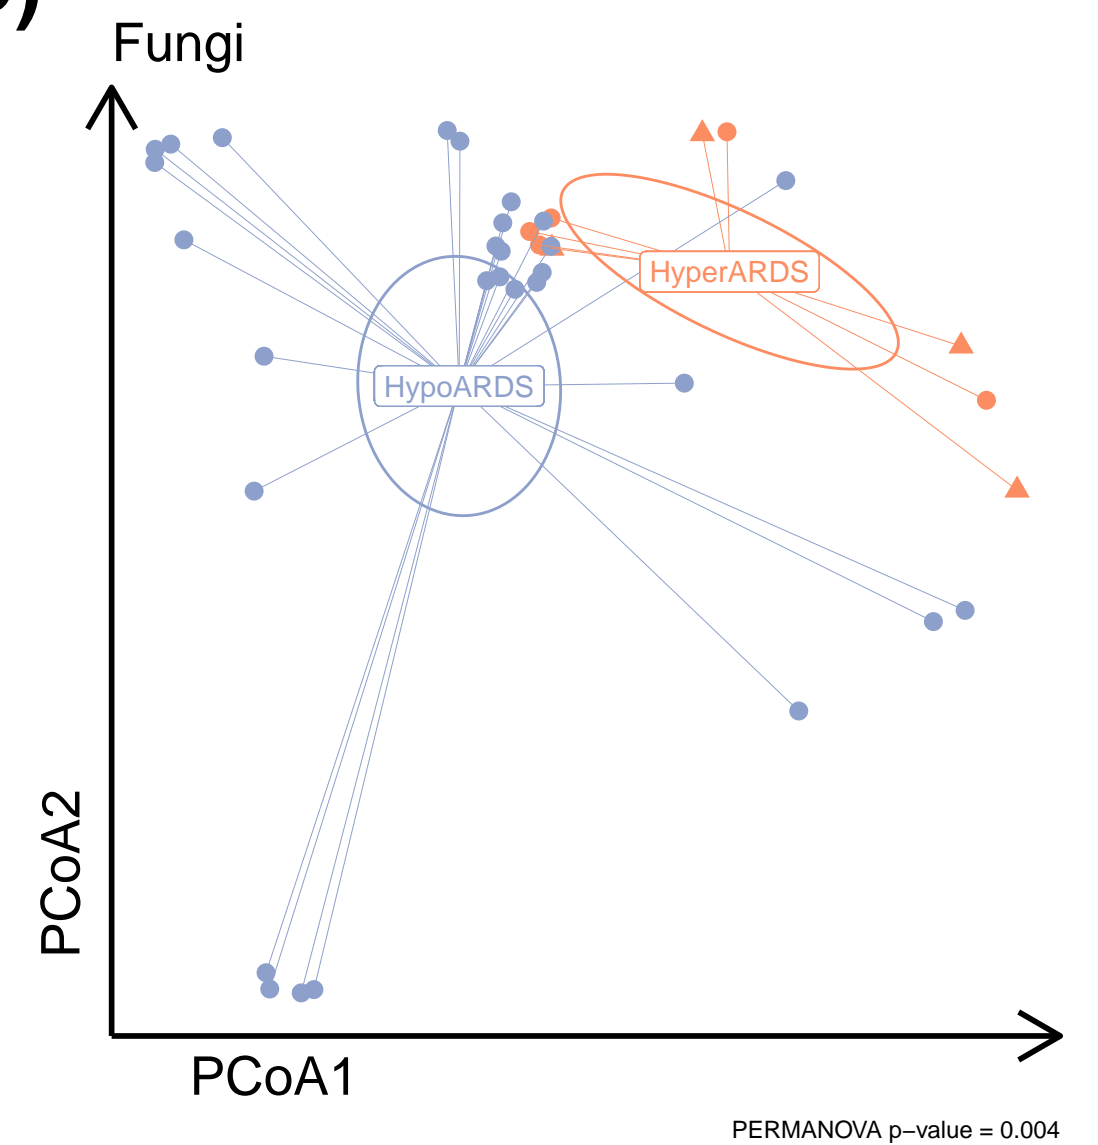**(E)**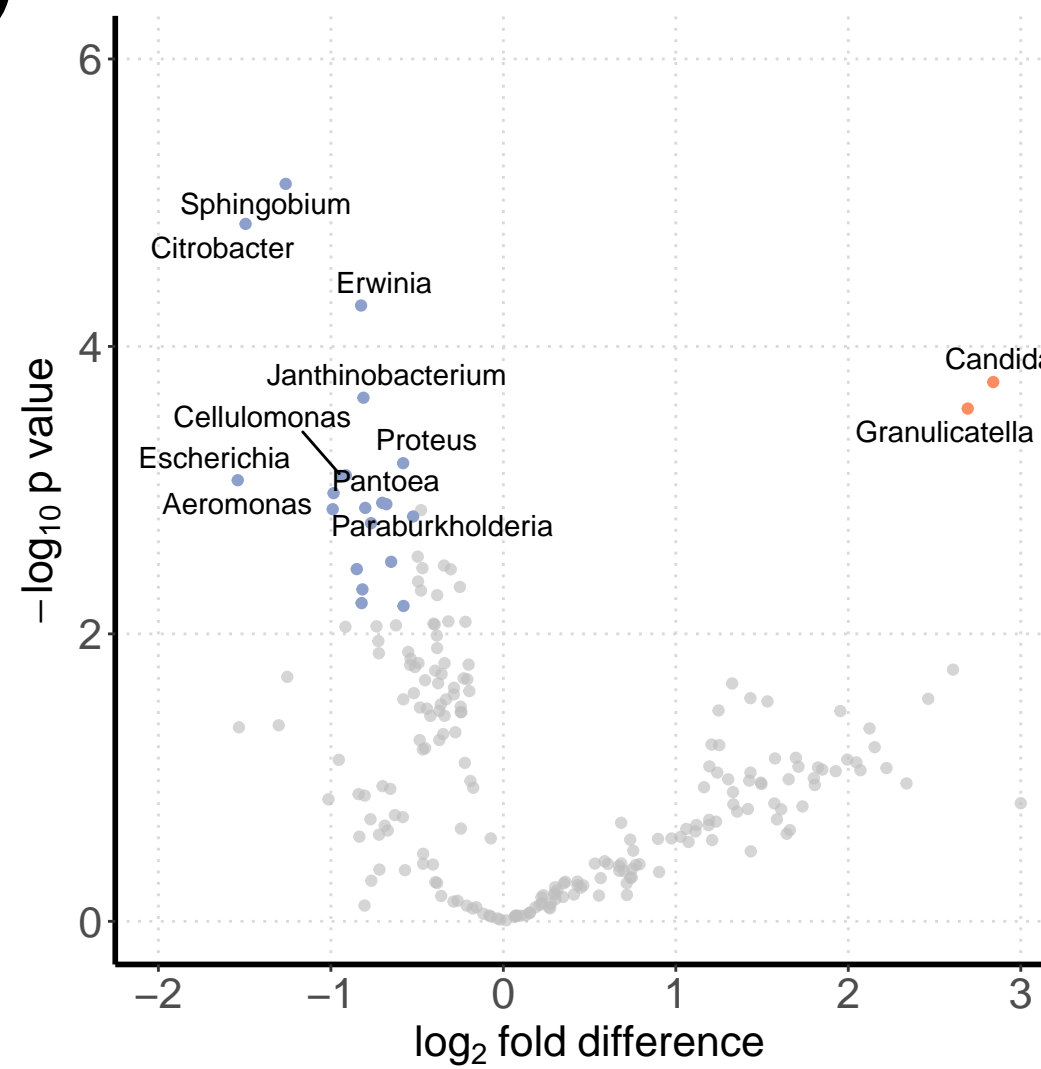

Source: https://www.medrxiv.org/content/medrxiv/early/2022/04/05/2022.03.31.22272425.full.pdf
